# Supplementary material for: Photocatalytic intermolecular anti-Markovnikov hydroamination of unactivated alkenes with N-hydroxyphthalimide
Source: Royal Society of Chemistry journal article supplement (doi:10.1039/d0qo01321h), 2020-11-19

# Photocatalytic intermolecular *anti*-Markovnikov hydroamination of unactivated alkenes with *N*-hydroxyphthalimide

Zhi-Peng Ye,<sup>a</sup> Yuan-Zhuo Hu,<sup>a</sup> Peng-Ju Xia,<sup>\*a,b</sup> Hao-Yue Xiang,<sup>\*a</sup> Kai Chen<sup>\*a,c</sup> and Hua Yang<sup>\*a</sup>

<sup>a</sup>College of Chemistry and Chemical Engineering, Central South University, Changsha 410083, P. R. China

<sup>b</sup>School of Chemistry and Pharmaceutical Sciences, Guangxi Normal University, Guilin 541004, P. R. China.

<sup>c</sup>State Key Laboratory of Chemical Oncogenomics, Peking University Shenzhen Graduate School, Shenzhen 518055, P. R. China

E-mail: [hyangchem@csu.edu.cn](mailto:hyangchem@csu.edu.cn), [kaichen@csu.edu.cn](mailto:kaichen@csu.edu.cn), [xianghaoyue@csu.edu.cn](mailto:xianghaoyue@csu.edu.cn), [xiaojujuxia@163.com](mailto:xiaojujuxia@163.com).

|                                                                  |     |
|------------------------------------------------------------------|-----|
| <b>1. General experimental methods</b> .....                     | S1  |
| <b>2. General procedure : synthesis of compounds 3a-3s</b> ..... | S1  |
| <b>3. Mechanistic studies</b> .....                              | S2  |
| <b>4. Characterization data of compounds</b> .....               | S5  |
| <b>5. Computational details</b> .....                            | S9  |
| <b>6. References</b> .....                                       | S26 |
| <b>7. Copies of NMR Spectra</b> .....                            | S28 |

---

## 1. General experimental methods

Unless otherwise noted, all the reagents were purchased from commercial suppliers and used without further purification.  $^1\text{H}$  NMR spectra were recorded at 400 MHz. The chemical shifts were recorded in *ppm* relative to tetramethylsilane and with the solvent resonance as the internal standard. Data were reported as follows: chemical shift, multiplicity (*s* = singlet, *d* = doublet, *t* = triplet, *q* = quartet, *br s* = broad singlet, *p* = quintet, *h* = sextet, *hept* = septet, *m* = multiplet), coupling constants (Hz), integration.  $^{13}\text{C}$  NMR data were collected at 100 MHz with complete proton decoupling. High resolution mass spectroscopy (HRMS) was recorded on TOF MS ES+ mass spectrometer and acetonitrile was used to dissolve the sample. Emission intensities were recorded using Perkin-Elmer LS 55 fluorescence spectrometer. Column chromatography was carried out on silica gel (200-300 mesh).

## 2. General procedure: synthesis of compounds 3a-3s

*N*-Hydroxyphthalimide (0.2 mmol, 1.0 equiv.), olefins (0.6 mmol, 3.0 equiv.),  $\text{P}(\text{OEt})_3$  (0.3 mmol, 1.5 equiv.),  $[\text{Ir}(\text{dFCF}_3\text{ppy})_2\text{dtbbpy}]\text{PF}_6$  (2 mol%) in MeCN (4 mL) was stirred at room temperature for 24h under irradiation of 30 W blue LEDs (distance app. 3 cm). Then, it was diluted with EtOAc (60 mL), and washed with brine ( $3 \times 20$  mL), dried over  $\text{Na}_2\text{SO}_4$  and concentrated under reduced pressure. The obtained crude product was then purified by flash chromatography using silica gel (EtOAc/PE = 1:9-1:4).

### 3. Mechanistic studies

#### 3.1 Emission quenching experiments (Stern–Volmer Studies)

All fluorescence measurements were recorded using a Hitachi FL-7000 Fluorometer. Quenching studies were conducted in MeCN. All  $[\text{Ir}(\text{dFCF}_3\text{ppy})_2\text{dtbbpy}]\text{PF}_6$  solutions (concentration of  $5 \mu\text{M}$ ) were excited at  $304\text{nm}$  and the emission intensity was collected at  $450\text{nm}$  (Figure S1(a)(b)). It was found that the wavelength of maximum emission of  $[\text{Ir}(\text{dFCF}_3\text{ppy})_2\text{dtbbpy}]\text{PF}_6$  is at a wavelength of  $450 \text{ nm}$ , and that of  $\text{P}(\text{OEt})_3$  is at  $409 \text{ nm}$  (Figure S1 (c-d)). Considering NHPI also had UV-Vis absorption near  $304 \text{ nm}$ ,<sup>1</sup> a competition of absorption of the light source between the photocatalyst and substrates may lead to a quenching effect of photocatalyst at  $450 \text{ nm}$ .

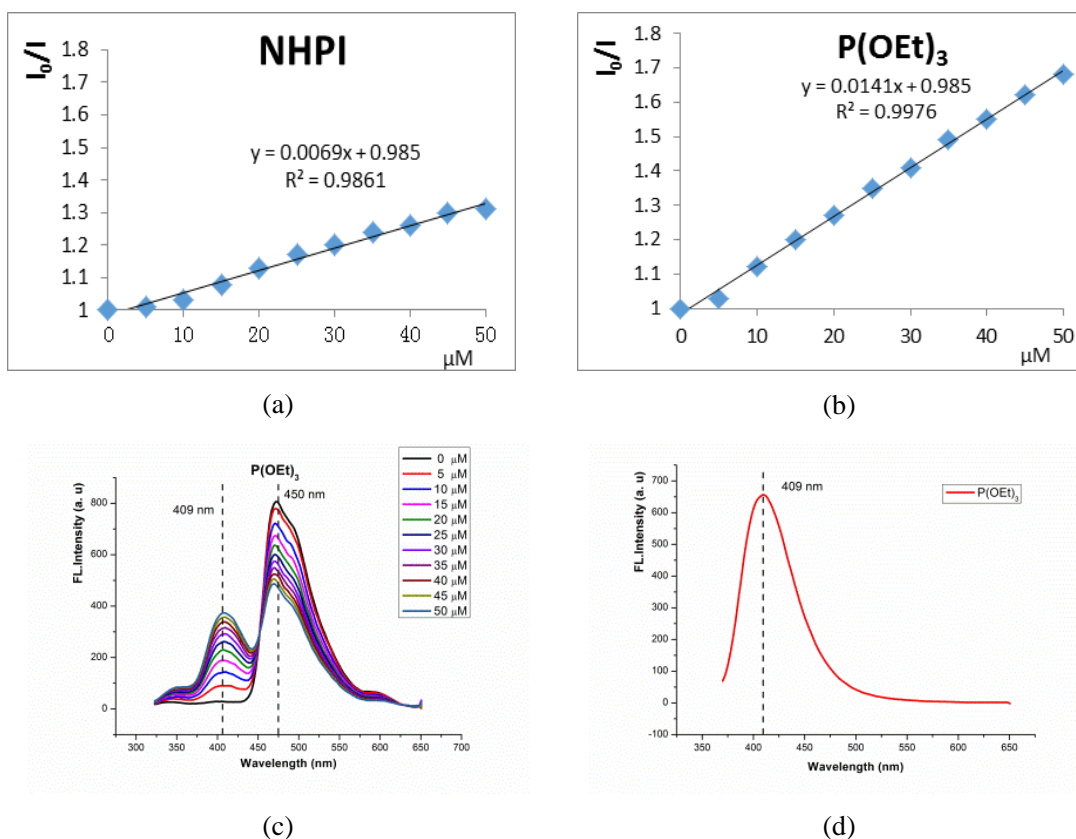

Figure S1. (a)(b) Stern-Volmer experiment in MeCN; (c) the fluorescence emission spectrum of  $[\text{Ir}(\text{dFCF}_3\text{ppy})_2\text{dtbbpy}]\text{PF}_6$  ( $c = 5 \mu\text{M}$ ) in the presence of  $\text{P}(\text{OEt})_3$  at different concentration in MeCN; (d) the fluorescence emission spectrum of  $\text{P}(\text{OEt})_3$  ( $c = 50 \mu\text{M}$ )

### 3.2 Trapping experiment

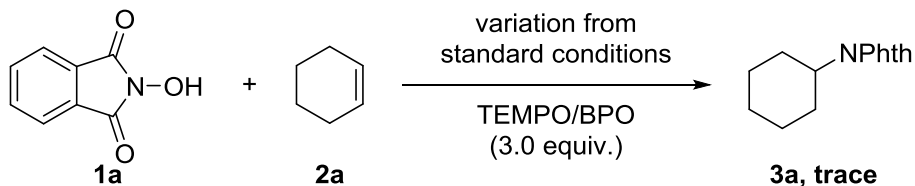

Figure S2. TEMPO/BPO trapping experiments

### 3.3 Control experiments for tracking hydrogen source

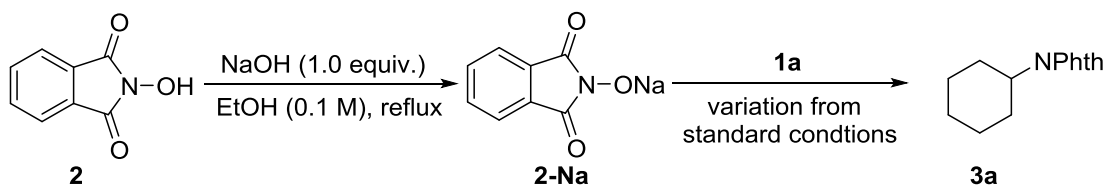

| Entry | Solvent                   | Yield (%) |
|-------|---------------------------|-----------|
| 1     | MeCN                      | NR        |
| 2     | MeCN/H <sub>2</sub> O 3:1 | NR        |

[a] Conditions: N-Hydroxyphthalimide (**2**) (0.2 mmol, 1.0 equiv.), olefin **1a** (0.6 mmol, 3.0 equiv.), P(OEt)<sub>3</sub> (0.3 mmol, 1.5 equiv.), [Ir(dFCF<sub>3</sub>ppy)<sub>2</sub>dtbbpy]PF<sub>6</sub> (2 mol%), MeCN (4 mL), 30 w blue LED, rt, argon atmosphere, 24 hours.

### 3.4 Time profile of the transformation with the light ON/OFF over time

The *N*-hydroxyphthalimide and phenyl vinyl sulfide were used as reactants under optimized reaction conditions and extra 3 equiv. of 1,3,5-trimethoxybenzene was added as the internal standard. After irradiation for 2.5 h, an aliquot (100  $\mu$ L) of the reaction mixture was transferred into a nuclear magnetic tube charged with 0.6 mL of CDCl<sub>3</sub>. The yield of product was determined by <sup>1</sup>H NMR. Then the reaction mixture was stirred for 2.5 h with light-off. All of the following yields were analyzed in the identical way after a 2.5 h light on or off.

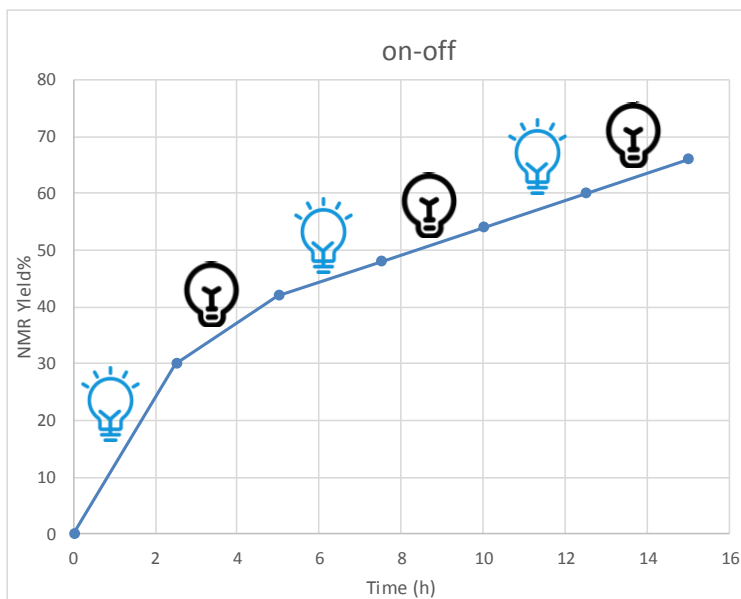

**Figure S2.** Time profile of the transformation with the light ON/OFF over time.

## 4. Characterization data of compounds

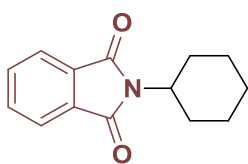

**3a**

*N*-cyclohexylphthalimide **3a**:<sup>2</sup>colorless oil (37.1 mg, 0.164 mmol, yield 82%);  
<sup>1</sup>H NMR (400 MHz, CDCl<sub>3</sub>) δ 7.79 – 7.83 (m, 2H), 7.67 – 7.70 (m, 2H), 4.10 (tt, *J* = 12.4, 4.0 Hz, 1H), 2.15 – 2.25 (m, 2H), 1.83 – 1.87 (m, 2H), 1.67 – 1.73 (m, 2H), 1.27 – 1.38 (m, 4H);

HRMS (ESI): C<sub>14</sub>H<sub>15</sub>NNaO<sub>2</sub><sup>+</sup> [M+Na]<sup>+</sup> Calcd 252.0995, Found 252.0996.

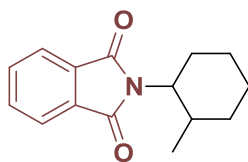

**3b**

*N*-(2-methylcyclohexyl)phthalimide **3b**:<sup>3</sup>colorless oil (37.1 mg, 0.132 mmol, yield 66%);<sup>77:23</sup> *trans:cis*\*;

<sup>1</sup>H NMR (400 MHz, CDCl<sub>3</sub>) δ 7.78 – 7.83 (m, 2H), 7.69 – 7.71 (m, 2H), 4.28 (dt, *J* = 12.8, 4.0 Hz, 0.23H)\*, 3.76 (td, *J* = 12.0, 4.0 Hz, 0.77 H), 2.81 (qd, *J* = 12.8, 4.0 Hz, 0.24 H)\*, 2.31 – 2.39 (m, 0.78 H), 2.13 – 2.23 (m, 1H), 1.83 – 1.93 (m, 2H), 1.70 – 1.73 (m, 2H), 1.04 – 1.64 (m, 3H), 1.02 (d, *J* = 7.2 Hz, 0.71 H)\*, 0.80 (d, *J* = 6.4 Hz, 2.38 H).

HRMS (ESI): C<sub>15</sub>H<sub>17</sub>NO<sub>2</sub>Na<sup>+</sup> [M+Na]<sup>+</sup> Calcd 266.1151, Found 266.1171.

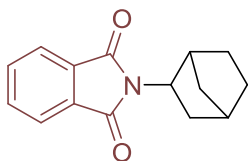

**3c**

*N*-(bicyclo[2.2.1]heptan-2-yl)phthalimide **3c**:<sup>3</sup>colorless oil (40.3mg, 0.166 mmol, yield 83%);<sup>73:27</sup> *exo:endo*\*;

<sup>1</sup>H NMR (400 MHz, CDCl<sub>3</sub>) δ 7.78 – 7.83 (m, 2H), 7.67 – 7.72 (m, 2H), 4.24 – 4.48 (m, 0.19H)\*, 4.14 (dd, *J* = 8.4, 5.6 Hz, 0.81H), 2.52 – 2.57 (m, 0.29H), 2.41 – 2.42 (m, 2H), 2.23 – 2.28 (m, 2H), 1.27 – 1.75 (m, 6H);

HRMS (ESI): C<sub>15</sub>H<sub>15</sub>NNaO<sub>2</sub><sup>+</sup> [M+Na]<sup>+</sup> Calcd 264.0995, Found 264.0980.

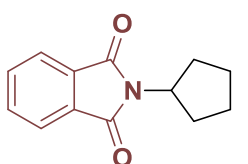

**3d**

*N*-cyclopentylphthalimide **3d**:<sup>3</sup>colorless oil (32.7 mg, 0.152 mmol, yield 76%);

<sup>1</sup>H NMR (400 MHz, CDCl<sub>3</sub>) δ 7.79 – 7.83 (m, 2H), 7.67 – 7.72 (m, 2H), 4.63 (p, *J* = 8.4 Hz, 1H), 2.06 – 2.15 (m, 2H), 1.89 – 2.01 (m, 4H), 1.60 – 1.70 (m, 2H);

HRMS (ESI): C<sub>13</sub>H<sub>13</sub>NNaO<sub>2</sub><sup>+</sup> [M+Na]<sup>+</sup> Calcd 238.0838, Found 238.0849.

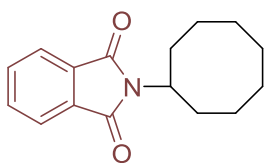

**3e**

*N*-cyclooctylphthalimide **3e**:<sup>3</sup>colorless oil (29.3 mg, 0.114 mmol, yield 57%);

<sup>1</sup>H NMR (400 MHz, CDCl<sub>3</sub>) δ 7.80 – 7.82 (m, 2H), 7.68 – 7.71 (m, 2H), 4.37 (tt, *J* = 10.4, 3.2 Hz, 1H), 2.28–2.36 (m, 2H), 1.74 – 1.84 (m, 6H), 1.53 – 1.61 (m, 6H);

HRMS (ESI): C<sub>16</sub>H<sub>19</sub>NNaO<sub>2</sub><sup>+</sup> [M+Na]<sup>+</sup> Calcd 280.1308, Found 280.1305.

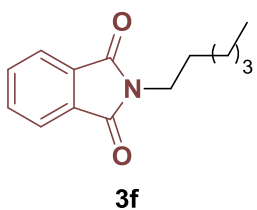

*N*-(hexyl)phthalimide **3f**:<sup>4</sup> colorless oil (28.6 mg, 0.124 mmol, yield 62%);  
<sup>1</sup>H NMR (400 MHz, CDCl<sub>3</sub>) δ 7.83 – 7.85 (m, 2H), 7.70 – 7.72 (m, 2H), 3.68 (t, *J* = 7.4 Hz, 2H), 1.65 – 1.69 (m, 2H), 1.26 – 1.34 (m, 6H), 0.88 (t, *J* = 6.8 Hz, 3H);

HRMS (ESI): C<sub>14</sub>H<sub>17</sub>NNaO<sub>2</sub><sup>+</sup> [M+Na]<sup>+</sup> Calcd 254.1151, Found 254.1168.

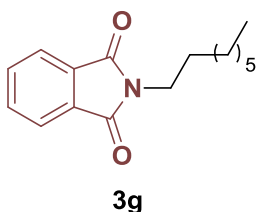

*N*-(octyl)phthalimide **3g**:<sup>5</sup> colorless oil (36.8 mg, 0.142 mmol yield 71%);  
<sup>1</sup>H NMR (400 MHz, CDCl<sub>3</sub>) δ 7.83 – 7.85 (m, 2H), 7.69 – 7.71 (m, 2H), 3.68 (t, *J* = 7.2 Hz, 2H), 1.64 – 1.69 (m, 2H), 1.32 – 1.33 (m, 10H), 0.87 (t, *J* = 7.2 Hz, 3H);

HRMS (ESI): C<sub>16</sub>H<sub>21</sub>NNaO<sub>2</sub><sup>+</sup> [M+Na]<sup>+</sup> Calcd 282.1465, Found 282.1477.

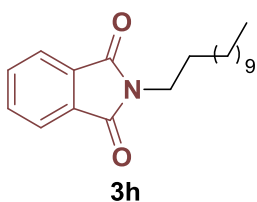

*N*-(dodecyl)phthalimide **3h**: colorless oil (37.8 mg, 0.120 mmol, yield 60%);  
<sup>1</sup>H NMR (400 MHz, CDCl<sub>3</sub>) δ 7.80 – 7.85 (m, 2H), 7.70 – 7.71 (m, 2H), 3.67 (t, *J* = 7.6 Hz, 2H), 1.65 – 1.69 (m, 2H), 1.28 – 1.34 (m, 18H), 0.86 – 0.89 (m, 3H);

<sup>13</sup>C NMR (100 MHz, Chloroform-*d*) δ 168.5, 133.8, 132.2, 123.1, 38.1, 31.9, 29.6 – 29.2 (m), 28.6, 22.7, 14.1;

HRMS (ESI): C<sub>20</sub>H<sub>29</sub>NO<sub>2</sub>K<sup>+</sup> [M+K]<sup>+</sup> Calcd 354.1830, Found 354.1801.

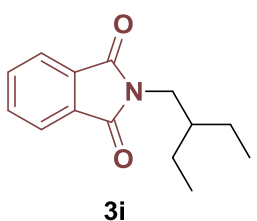

*N*-(2-ethylbutyl)phthalimide **3i**: colorless oil (32.8 mg, 0.142 mmol, yield 71%);

<sup>1</sup>H NMR (400 MHz, CDCl<sub>3</sub>) δ 7.83 – 7.85 (m, 2H), 7.70 – 7.72 (m, 2H), 3.59 (d, *J* = 7.2 Hz, 2H), 1.75–1.82 (m, 1H), 1.34 (p, *J* = 7.2 Hz, 4H), 0.92 (t, *J* = 3.6 Hz, 6H);

<sup>13</sup>C NMR (100 MHz, CDCl<sub>3</sub>) δ 168.7, 133.8, 132.1, 123.1, 41.6, 39.7, 23.3, 10.5;

HRMS (ESI): C<sub>14</sub>H<sub>17</sub>NNaO<sub>2</sub><sup>+</sup> [M+Na]<sup>+</sup> Calcd 254.1151, Found 254.1143.

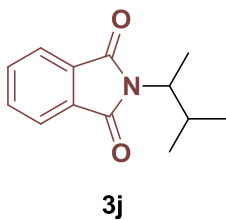

*N*-(3-methylbutan-2-yl)phthalimide **3j**:<sup>6</sup> colorless oil (23.4 mg, 0.108 mmol, yield 54%);

<sup>1</sup>H NMR (400 MHz, CDCl<sub>3</sub>) δ 7.81 – 7.83 (m, 2H), 7.69 – 7.72 (m, 2H), 3.91 – 3.99 (m, 1H), 2.35 – 2.44 (m, 1H), 1.47 (d, *J* = 6.8 Hz, 3H), 1.03 (d, *J* = 6.8 Hz, 3H), 0.83 (d, *J* = 6.4 Hz, 3H).

HRMS (ESI): C<sub>13</sub>H<sub>15</sub>NNaO<sub>2</sub><sup>+</sup> [M+Na]<sup>+</sup> Calcd 240.0995, Found 240.0998.

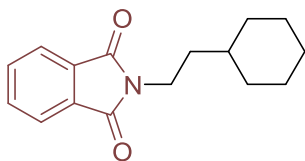**3k**

*N*-(2-cyclohexylethyl)phthalimide **3k**: colorless oil (36.5 mg, 0.142 mmol, yield 71%);

$^1\text{H NMR}$  (400 MHz,  $\text{CDCl}_3$ )  $\delta$  7.83 – 7.85 (m, 2H), 7.70 – 7.72 (m, 2H), 3.70 (t,  $J = 7.6$  Hz, 2H), 1.76 – 1.82 (m, 2H), 1.62 – 1.73 (m, 3H), 1.56 (q,  $J = 7.2$  Hz, 2H), 1.24 – 1.33 (m, 2H), 1.16 – 1.22 (m, 2H), 0.90

–1.00 (m, 2H);

$^{13}\text{C NMR}$  (100 MHz,  $\text{CDCl}_3$ )  $\delta$  168.4, 133.8, 132.2, 123.1, 36.0, 35.9, 35.4, 33.0, 26.5, 26.2;

HRMS (ESI):  $\text{C}_{16}\text{H}_{19}\text{NNaO}_2^+$   $[\text{M}+\text{Na}]^+$  Calcd 280.1308, Found 280.1308.

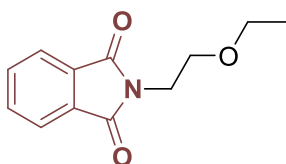**3l**

*N*-(2-ethoxyethyl)phthalimide **3l**:<sup>3</sup> colorless oil (32.0 mg, 0.146 mmol, yield 73%);

$^1\text{H NMR}$  (400 MHz,  $\text{CDCl}_3$ )  $\delta$  7.83 – 7.86 (m, 2H), 7.70 – 7.74 (m, 2H), 3.90 (t,  $J = 6.0$  Hz, 2H), 3.68 (t,  $J = 6.0$  Hz, 2H), 3.52 (q,  $J = 6.8$  Hz, 2H), 1.15 (t,  $J = 7.2$  Hz, 3H);

HRMS (ESI):  $\text{C}_{12}\text{H}_{13}\text{NNaO}_3^+$   $[\text{M}+\text{Na}]^+$  Calcd 242.0788, Found 242.0804.

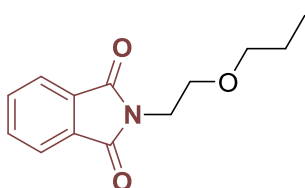**3m**

*N*-(2-propoxyethyl)phthalimide **3m**: colorless oil (31.7 mg, 0.136 mmol, yield 68%);

$^1\text{H NMR}$  (400 MHz,  $\text{CDCl}_3$ )  $\delta$  7.84 – 7.86 (m, 2H), 7.71 – 7.73 (m, 2H), 3.90 (t,  $J = 6.0$  Hz, 2H), 3.68 (t,  $J = 6.0$  Hz, 2H), 3.42 (t,  $J = 6.4$  Hz, 2H), 1.54 (h,  $J = 7.2$  Hz, 2H), 0.85 (t,  $J = 7.6$  Hz, 3H);

$^{13}\text{C NMR}$  (100 MHz,  $\text{CDCl}_3$ )  $\delta$  168.3, 133.9, 132.1, 123.2, 72.5, 67.3, 37.4, 22.8, 10.4.

HRMS (ESI):  $\text{C}_{13}\text{H}_{15}\text{NNaO}_2^+$   $[\text{M}+\text{Na}]^+$  Calcd 256.0944, Found 256.0947.

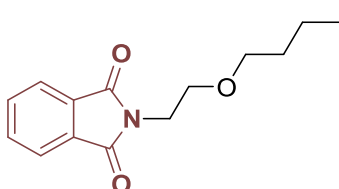**3n**

*N*-(2-butoxyethyl)phthalimide **3n**:<sup>3</sup> colorless oil (34.6 mg, 0.140 mmol, yield 70%);

$^1\text{H NMR}$  (400 MHz,  $\text{CDCl}_3$ )  $\delta$  7.84 – 7.86 (m, 2H), 7.71 – 7.74 (m, 2H), 3.89 (t,  $J = 5.6$  Hz, 2H), 3.67 (t,  $J = 6.0$  Hz, 2H), 3.45 (t,  $J = 6.8$  Hz, 2H), 1.46 – 1.55 (m, 2H), 1.25 – 1.34 (m, 2H), 0.85 (t,  $J = 7.2$  Hz,

3H);

HRMS (ESI):  $\text{C}_{14}\text{H}_{17}\text{NNaO}_3^+$   $[\text{M}+\text{Na}]^+$  Calcd 270.1101, Found 270.1113.

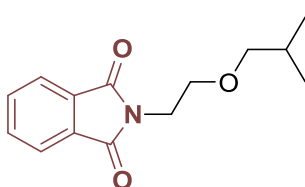**3o**

*N*-(2-isobutoxyethyl)phthalimide **3o**:<sup>3</sup> colorless oil (32.1 mg, 0.130 mmol, yield 65%);



$^1\text{H NMR}$  (400 MHz,  $\text{CDCl}_3$ )  $\delta$  7.84 – 7.86 (m, 2H), 7.71 – 7.74 (m, 2H), 3.90 (t,  $J = 6.4$  Hz, 2H), 3.67 (t,  $J = 6.0$  Hz, 2H), 3.21 (d,  $J = 6.8$  Hz, 2H), 1.76 – 1.83 (m, 1H), 0.83 (d,  $J = 6.8$  Hz, 6H);

HRMS (ESI):  $\text{C}_{14}\text{H}_{17}\text{NNaO}_3^+$   $[\text{M}+\text{Na}]^+$  Calcd 270.1101, Found 270.1115.

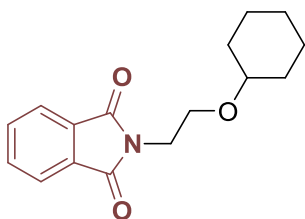

**3p**

*N*-(2-(cyclohexyloxy)ethyl)phthalimide **3p**:<sup>3</sup> colorless oil (40.4 mg, 0.148 mmol, yield 74%);

$^1\text{H NMR}$  (400 MHz,  $\text{CDCl}_3$ )  $\delta$  7.84 – 7.86 (m, 2H), 7.70 – 7.73 (m, 2H), 3.87 (t,  $J = 6.0$  Hz, 2H), 3.69 (t,  $J = 6.0$  Hz, 2H), 3.24 – 3.30 (m, 1H), 1.79 – 1.84 (m, 2H), 1.66 – 1.68 (m, 2H), 1.47 – 1.49 (m, 2H), 1.17 – 1.22 (m, 4H);

HRMS (ESI):  $\text{C}_{16}\text{H}_{19}\text{NNaO}_3^+$   $[\text{M}+\text{Na}]^+$  Calcd 296.1257, Found 296.1235.

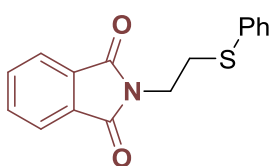

**3q**

*N*-(2-(phenylthio)ethyl)phthalimide **3q**:<sup>3</sup> colorless oil (40.8 mg, 0.144 mmol, yield 72%);

$^1\text{H NMR}$  (400 MHz,  $\text{CDCl}_3$ )  $\delta$  7.79 – 7.82 (m, 2H), 7.68 – 7.70 (m, 2H), 7.30 (d,  $J = 7.6$  Hz, 2H), 7.23 – 7.26 (m, 2H), 7.12 (t,  $J = 7.2$  Hz, 1H), 3.93 (t,  $J = 7.2$  Hz, 2H), 3.23 (t,  $J = 7.2$  Hz, 2H);

HRMS (ESI):  $\text{C}_{16}\text{H}_{13}\text{NNaO}_2\text{S}^+$   $[\text{M}+\text{Na}]^+$  Calcd 306.0559, Found 306.0562.

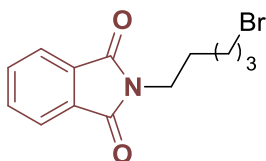

**3r**

*N*-(5-bromopentyl)phthalimide **3r**:<sup>3</sup> colorless oil (38.4 mg, 0.130 mmol, yield 65%);

$^1\text{H NMR}$  (400 MHz,  $\text{CDCl}_3$ )  $\delta$  7.84 – 7.86 (m, 2H), 7.70 – 7.73 (m, 2H), 3.70 (t,  $J = 7.2$  Hz, 2H), 3.40 (t,  $J = 6.8$  Hz, 2H), 1.88 – 1.95 (m, 2H), 1.68 – 1.76 (m, 2H), 1.47 – 1.54 (m, 2H).

HRMS (ESI):  $\text{C}_{13}\text{H}_{14}\text{NBrNaO}_2^+$   $[\text{M}+\text{Na}]^+$  Calcd 318.0100, Found 318.0097.

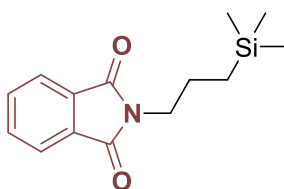

**3s**

*N*-(3-(trimethylsilyl)propyl)phthalimide **3s**: colorless oil (19.8 mg, 0.076 mmol, yield 38%);

$^1\text{H NMR}$  (400 MHz,  $\text{CDCl}_3$ )  $\delta$  7.84 – 7.88 (m, 2H), 7.71 – 7.75 (m, 2H), 3.68 (t,  $J = 7.2$  Hz, 2H), 1.65 – 1.72 (m, 2H), 0.52 – 0.57 (m, 2H), 0 (s, 9H);

$^{13}\text{C NMR}$  (100 MHz,  $\text{CDCl}_3$ )  $\delta$  170.2, 135.6, 134.0, 124.9, 42.9, 25.1, 15.6, 0.0;

HRMS (ESI):  $\text{C}_{14}\text{H}_{19}\text{NNaO}_2\text{Si}^+$   $[\text{M}+\text{Na}]^+$  Calcd 284.1077, Found 284.1072.

## 5. Computational details

All calculations were carried out using DFT as implemented in Gaussian16 software package.<sup>7</sup>The hybrid PBE functional<sup>8</sup>in conjugation with def2-TZVP basis set for iridium and def2-SVP basis sets for other atoms was applied for the optimization of all stationary points.<sup>9,10</sup>Frequency calculations were performed at the same level to verify the stationary points are minima (0 imaginary frequency) or saddle points (only 1 imaginary frequency). Single point energy calculations were carried out with Truhlar's M06 functional<sup>11</sup>with def2-TZVPP basis set for all atoms. Time-dependent DFT (TD-DFT) calculations were performed for the excited state structures. Solvation effects of acetonitrile for all calculations were considered using Truhlar's SMD solvent model.<sup>12</sup>Broken symmetry functional was chosen for open shell systems. Computed structures were illustrated by CYLView software.<sup>13</sup>

### 5.1 Comparison of experimental and calculated redox potentials.

| $E_{1/2}^{\text{red}}$ in V vs. SCE <sup>a</sup> | *[Ir(III)]/[Ir(II)] | [Ir(III)]/[Ir(II)]  | Ph <sub>3</sub> P <sup>+</sup> /Ph <sub>3</sub> P | (EtO) <sub>3</sub> P <sup>+</sup> /(EtO) <sub>3</sub> P |
|--------------------------------------------------|---------------------|---------------------|---------------------------------------------------|---------------------------------------------------------|
| Experiment                                       | +1.21 <sup>14</sup> | -1.37 <sup>15</sup> | +0.98 <sup>16</sup>                               | +1.57 <sup>16</sup>                                     |
| Calculation                                      | +1.22               | -1.35               | +1.04                                             | +1.60                                                   |

<sup>a</sup>[Ir(III)] = [Ir(dFCF<sub>3</sub>ppy)<sub>2</sub>dtbbpy]<sup>+</sup>, [Ir(II)] = [Ir(dFCF<sub>3</sub>ppy)<sub>2</sub>dtbbpy].

As shown above, the calculated redox potentials, at M06/def2-TZVPP-SMD(CH<sub>3</sub>CN)//PBE/def2SVP(C,H,N,O,P)-def2-TZVP(Ir)-SMD(CH<sub>3</sub>CN) theoretical level, are in good agreement with the experimental data, which also suggests our computational level is reliable.

### 5.2 Calculated singlet-triplet energy gaps.

|                                                | [Ir(III)] | NHPI | P(OEt) <sub>3</sub> |
|------------------------------------------------|-----------|------|---------------------|
| $\Delta E_{\text{ST}}$ (kcal/mol) <sup>a</sup> | 59.2      | 59.6 | 82.1                |

<sup>a</sup> $\Delta E_{\text{ST}}$  was reported at M06/def2-TZVPP-SMD(CH<sub>3</sub>CN)//PBE/def2SVP(C,H,N,O,P)-def2-TZVP(Ir)-SMD(CH<sub>3</sub>CN) theoretical level.

As the singlet-triplet energy gap of NHPI or P(OEt)<sub>3</sub> is even larger than that of [Ir(dFCF<sub>3</sub>ppy)<sub>2</sub>dtbbpy]<sup>+</sup>, triplet energy transfer from sensitizer Ir(III) to substrates seems to be impossible.

### 5.3 Possible electron transfer patterns from \*[Ir(III)] to NHPI.

As shown below, single electron transfer from NHPI to the excited [Ir(III)] catalyst is an endergonic process, as large as 26.9 kcal/mol. However, in the presence of P(OEt)<sub>3</sub>, a concerted proton-coupled electron transfer seems to be feasible, with an exergonicity of 6.7 kcal/mol.

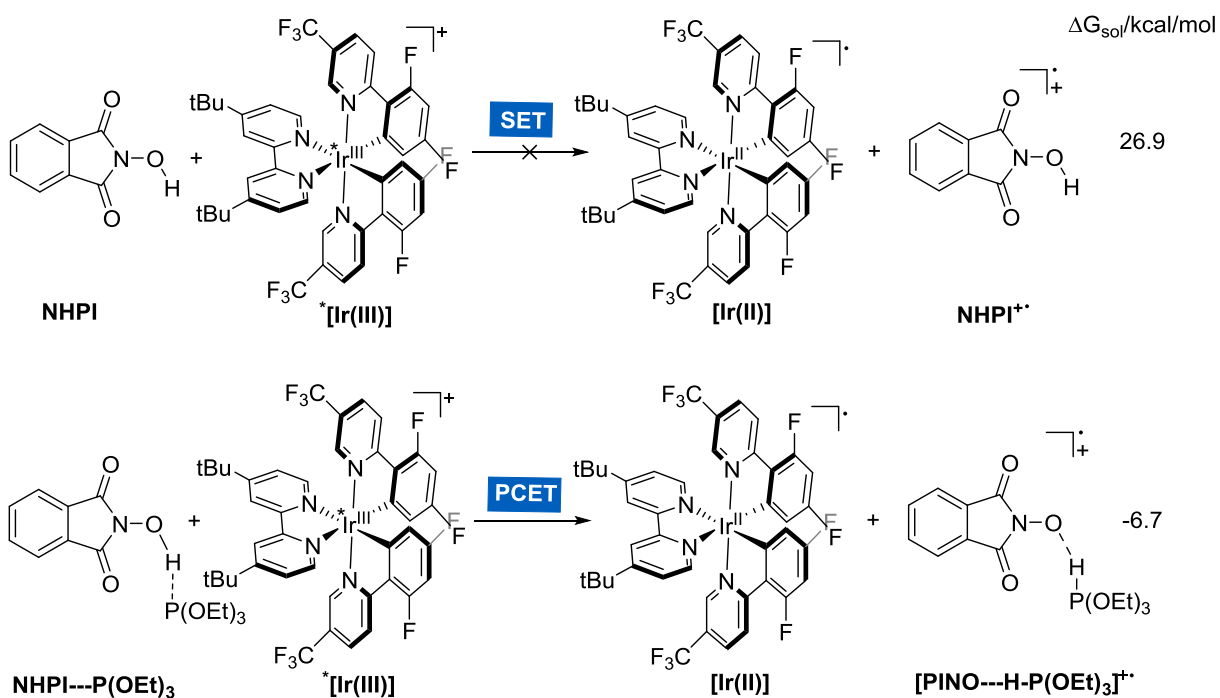

#### 5.4 The optimized structures of important stationary points

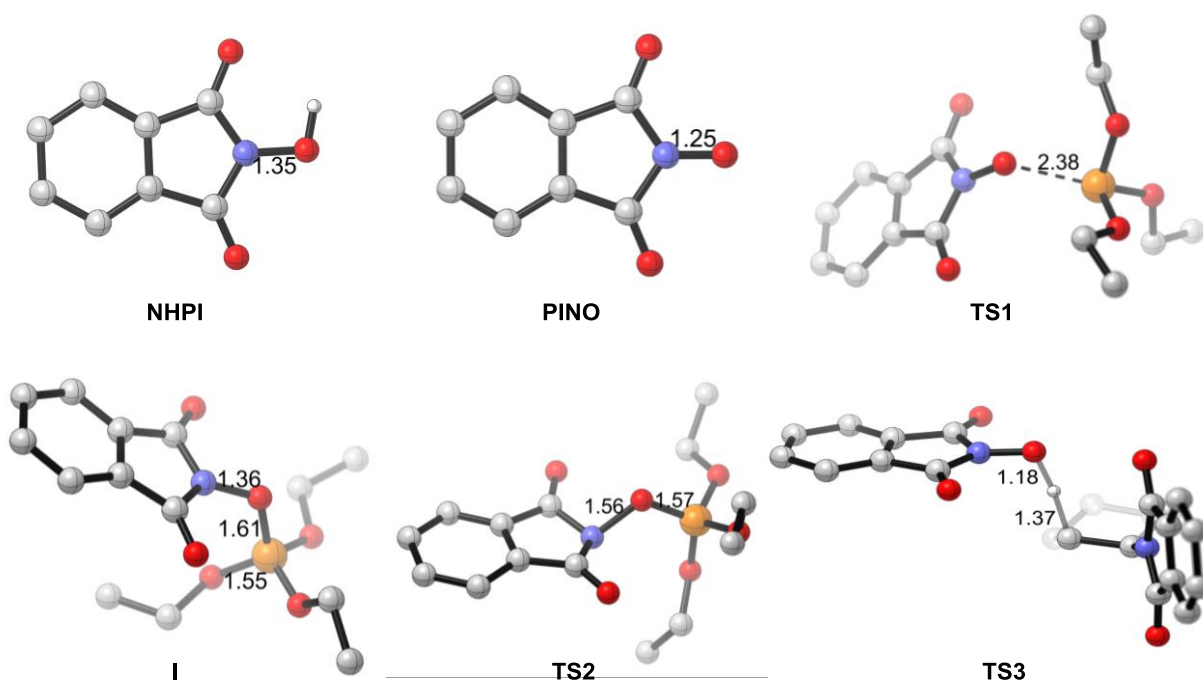

## 5.5 Table of energies and other thermodynamic parameters.

| Structure                                       | E <sub>ele</sub> | E <sub>ele</sub> (SP) | E <sub>0</sub> | E           | H           | G           |
|-------------------------------------------------|------------------|-----------------------|----------------|-------------|-------------|-------------|
| <b>Ir(III)</b>                                  | -2937.67088      | -2942.20156           | -2936.98260    | -2936.93193 | -2936.93098 | -2937.07213 |
| <b>*[Ir(III)]</b>                               | -2937.57078      | -2942.10204           | -2936.88614    | -2936.83489 | -2936.83394 | -2936.97730 |
| <b>[Ir(II)]</b>                                 | -2937.78218      | -2942.31333           | -2937.09769    | -2937.04669 | -2937.04574 | -2937.18836 |
| <b>PPh<sub>3</sub></b>                          | -1034.55290      | -1035.78995           | -1034.27669    | -1034.26081 | -1034.25986 | -1034.32304 |
| <b>*PPh<sub>3</sub></b>                         | -1034.75533      | -1035.99358           | -1034.47978    | -1034.46395 | -1034.46301 | -1034.52620 |
| <b>[NHPI--P(OEt)<sub>3</sub>]</b>               | -1390.83188      | -1392.78836           | -1390.49560    | -1390.47167 | -1390.47072 | -1390.55488 |
| <b>[PINO--HP(OEt)<sub>3</sub>]<sup>++</sup></b> | -1390.62582      | -1392.58473           | -1390.29027    | -1390.26538 | -1390.26443 | -1390.35214 |
| <b>NHPI</b>                                     | -587.18788       | -588.12760            | -587.06743     | -587.05795  | -587.05700  | -587.10241  |
| <b>*NHPI</b>                                    | -586.93849       | -587.87318            | -586.81834     | -586.80912  | -586.80818  | -586.85371  |
| <b>NHPI(triplet)</b>                            | -587.09728       | -588.03034            | -586.97889     | -586.96987  | -586.96892  | -587.01411  |
| <b>P(OEt)<sub>3</sub></b>                       | -803.63166       | -804.64976            | -803.41780     | -803.40389  | -803.40294  | -803.46136  |
| <b>*P(OEt)<sub>3</sub></b>                      | -803.40687       | -804.42488            | -803.19217     | -803.17798  | -803.17704  | -803.23661  |
| <b>P(OEt)<sub>3</sub>(triplet)</b>              | -803.51379       | -804.51474            | -803.30171     | -803.28719  | -803.28624  | -803.34772  |
| <b>+HP(OEt)<sub>3</sub></b>                     | -804.05951       | -805.08622            | -803.83351     | -803.81950  | -803.81856  | -803.87632  |
| <b>PINO</b>                                     | -586.55817       | -587.49149            | -586.44913     | -586.44053  | -586.43958  | -586.48378  |
| <b>O=P(OEt)<sub>3</sub></b>                     | -878.77046       | -879.94720            | -878.55098     | -878.53628  | -878.53534  | -878.59581  |
| <b>TS1</b>                                      | -1390.18958      | -1392.13900           | -1389.86585    | -1389.84221 | -1389.84126 | -1389.92453 |
| <b>I</b>                                        | -1390.19559      | -1392.16515           | -1389.86971    | -1389.84640 | -1389.84545 | -1389.92556 |
| <b>TS2</b>                                      | -1390.17948      | -1392.15031           | -1389.85632    | -1389.83325 | -1389.83231 | -1389.91183 |
| <b>II</b>                                       | -511.46338       | -512.27037            | -511.36045     | -511.35254  | -511.35159  | -511.39450  |
| <b>cyclohexene</b>                              | -234.19574       | -234.54029            | -234.04942     | -234.04392  | -234.04297  | -234.07803  |
| <b>III</b>                                      | -745.73811       | -746.87869            | -745.48403     | -745.47015  | -745.46920  | -745.52574  |
| <b>TS3</b>                                      | -1332.92825      | -1335.00031           | -1332.55624    | -1332.53244 | -1332.53150 | -1332.61369 |
| <b>3a</b>                                       | -746.40164       | -747.54448            | -746.13291     | -746.11928  | -746.11833  | -746.17372  |

**Notes:** E<sub>ele</sub>, E<sub>0</sub>, E, H, and G were the electronic energies, sum of electronic and zero-point energies, sum of electronic and thermal energies, sum of electronic and thermal enthalpies, and sum of electronic and thermal free energies, respectively, which were given at the PBE/def2SVP(C,H,N,O,P)-def2-TZVP(Ir)-SMD(CH<sub>3</sub>CN) level. E<sub>ele</sub>(SP) were single point electronic energies at the M06/def2-TZVPP-SMD(acetonitrile) level.

## 5.6 Coordinates of all stationary points.

|                              |           |          |           |   |           |          |           |
|------------------------------|-----------|----------|-----------|---|-----------|----------|-----------|
|                              |           |          |           | C | -1.100172 | 4.818411 | 11.581809 |
| <b>[Ir(III)]</b>             |           |          |           | C | -0.990713 | 3.451804 | 11.393183 |
| <b>0 imaginary frequency</b> |           |          |           | C | -0.149750 | 2.755069 | 12.254920 |
| Ir                           | 1.338313  | 5.859245 | 14.884365 | C | 0.563847  | 3.374317 | 13.273065 |
| C                            | 0.449100  | 4.756112 | 13.462788 | C | -0.468157 | 6.928757 | 12.853949 |
| C                            | -0.403434 | 5.497471 | 12.594605 | C | -1.218830 | 7.876142 | 12.138876 |

---

|   |           |           |           |   |           |           |           |
|---|-----------|-----------|-----------|---|-----------|-----------|-----------|
| C | -1.173064 | 9.211533  | 12.495659 | H | -1.833386 | 7.552823  | 11.303323 |
| C | -0.372301 | 9.599384  | 13.572942 | H | -1.756822 | 9.947119  | 11.938187 |
| C | 0.345337  | 8.627208  | 14.248976 | H | 0.981842  | 8.889341  | 15.093467 |
| N | 0.300734  | 7.333950  | 13.905282 | H | 0.954563  | 8.023992  | 19.525335 |
| N | 2.063139  | 7.086190  | 16.491880 | H | 2.687846  | 10.040949 | 21.882270 |
| C | 1.249063  | 7.211371  | 17.561077 | H | 1.362429  | 9.902459  | 20.711822 |
| C | 1.635850  | 7.948923  | 18.681143 | H | 2.081717  | 8.435333  | 21.434776 |
| C | 2.879757  | 8.582298  | 18.730250 | H | 4.998130  | 9.358819  | 21.340951 |
| C | 3.349283  | 9.402332  | 19.927924 | H | 4.468333  | 7.741367  | 20.813707 |
| C | 2.304503  | 9.440206  | 21.044434 | H | 5.446151  | 8.762002  | 19.728771 |
| C | 4.641110  | 8.775528  | 20.478325 | H | 3.972511  | 11.447546 | 20.310950 |
| C | 3.627332  | 10.840581 | 19.459896 | H | 2.717170  | 11.308296 | 19.054023 |
| C | 3.699127  | 8.428669  | 17.602590 | H | 4.406648  | 10.879527 | 18.684476 |
| C | 3.262099  | 7.682665  | 16.520898 | H | 4.688002  | 8.886290  | 17.549350 |
| C | -0.056909 | 6.525574  | 17.455611 | H | -1.529244 | 4.597655  | 15.241134 |
| N | -0.251593 | 5.808882  | 16.328588 | H | -3.343475 | 4.646053  | 16.909413 |
| C | -1.414899 | 5.164781  | 16.167042 | H | -0.848435 | 7.189397  | 19.336808 |
| C | -2.425643 | 5.199532  | 17.113048 | H | -5.441770 | 6.595605  | 19.451425 |
| C | -2.258063 | 5.931959  | 18.297173 | H | -4.457110 | 7.586359  | 18.345251 |
| C | -1.039743 | 6.598985  | 18.443888 | H | -4.983586 | 5.954997  | 17.859135 |
| C | -3.362513 | 5.976845  | 19.348568 | H | -3.802109 | 6.839721  | 21.278986 |
| C | -4.631718 | 6.561399  | 18.706814 | H | -2.084776 | 6.450505  | 21.067987 |
| C | -2.976582 | 6.838342  | 20.552155 | H | -2.787493 | 7.884582  | 20.266693 |
| C | -3.637577 | 4.543284  | 19.832433 | H | -4.436194 | 4.554278  | 20.590042 |
| N | 2.428792  | 4.310957  | 15.674378 | H | -2.739547 | 4.099981  | 20.289429 |
| C | 3.652702  | 4.092567  | 15.113063 | H | -3.963997 | 3.886270  | 19.012744 |
| C | 3.971428  | 5.003538  | 14.022847 | H | 5.440162  | 2.884221  | 15.156554 |
| C | 5.164792  | 5.005912  | 13.282465 | H | 4.656673  | 1.457016  | 17.024954 |
| C | 5.401285  | 5.906036  | 12.258229 | H | 1.013864  | 3.759665  | 17.084747 |
| C | 4.399039  | 6.828856  | 11.976795 | H | 6.336950  | 5.886560  | 11.699786 |
| C | 3.199342  | 6.872398  | 12.675479 | H | -1.543405 | 2.949371  | 10.599571 |
| C | 2.963800  | 5.961538  | 13.711465 | H | 1.204100  | 2.754164  | 13.902405 |
| C | 4.464897  | 3.056951  | 15.603079 | H | 3.887247  | 7.555136  | 15.634970 |
| C | 4.024013  | 2.262273  | 16.645540 | H | 2.464927  | 7.627072  | 12.389604 |
| C | 2.764394  | 2.505754  | 17.199018 | F | -1.908001 | 5.483841  | 10.753774 |
| C | 2.002333  | 3.540135  | 16.682695 | F | -0.029275 | 1.440487  | 12.089013 |

|                              |           |           |           |   |           |           |           |
|------------------------------|-----------|-----------|-----------|---|-----------|-----------|-----------|
| C                            | -0.288655 | 11.042385 | 13.981928 | C | -0.014264 | 6.516462  | 17.412011 |
| F                            | -1.498766 | 11.537288 | 14.258796 | N | -0.231958 | 5.783353  | 16.259512 |
| F                            | 0.224266  | 11.794811 | 13.003542 | C | -1.423523 | 5.172436  | 16.093661 |
| F                            | 0.474786  | 11.211958 | 15.062633 | C | -2.431289 | 5.209919  | 17.026793 |
| F                            | 4.606651  | 7.702370  | 10.994955 | C | -2.241374 | 5.932260  | 18.245817 |
| F                            | 6.129087  | 4.123327  | 13.551171 | C | -1.031781 | 6.568860  | 18.405960 |
| C                            | 2.249442  | 1.658235  | 18.327350 | C | -3.353600 | 5.965897  | 19.289662 |
| F                            | 3.080991  | 1.688688  | 19.373185 | C | -4.614271 | 6.579116  | 18.657894 |
| F                            | 2.134983  | 0.378415  | 17.959510 | C | -2.970250 | 6.794126  | 20.516882 |
| F                            | 1.051684  | 2.064519  | 18.751206 | C | -3.654534 | 4.527446  | 19.742677 |
| <b>*[Ir(III)]</b>            |           |           |           | N | 2.436598  | 4.295922  | 15.660551 |
| <b>0 imaginary frequency</b> |           |           |           | C | 3.686226  | 4.114042  | 15.151712 |
| Ir                           | 1.355124  | 5.828133  | 14.831940 | C | 4.021900  | 5.041533  | 14.077464 |
| C                            | 0.392673  | 4.727167  | 13.478058 | C | 5.223484  | 5.060481  | 13.360789 |
| C                            | -0.472163 | 5.489381  | 12.630855 | C | 5.467494  | 5.987789  | 12.356511 |
| C                            | -1.185549 | 4.818320  | 11.631743 | C | 4.473820  | 6.918619  | 12.061266 |
| C                            | -1.092837 | 3.443838  | 11.457135 | C | 3.260258  | 6.942463  | 12.732679 |
| C                            | -0.254547 | 2.725177  | 12.306678 | C | 3.014098  | 5.998574  | 13.740085 |
| C                            | 0.483537  | 3.337647  | 13.308623 | C | 4.510760  | 3.111411  | 15.678853 |
| C                            | -0.518275 | 6.923698  | 12.891463 | C | 4.050794  | 2.317567  | 16.716674 |
| C                            | -1.306739 | 7.870245  | 12.224109 | C | 2.768255  | 2.533259  | 17.223182 |
| C                            | -1.253563 | 9.201250  | 12.604711 | C | 1.991223  | 3.537714  | 16.667497 |
| C                            | -0.412567 | 9.577562  | 13.652773 | H | -1.959453 | 7.556206  | 11.414141 |
| C                            | 0.347563  | 8.603404  | 14.281224 | H | -1.869598 | 9.940631  | 12.088747 |
| N                            | 0.299216  | 7.321715  | 13.904761 | H | 1.017545  | 8.845324  | 15.106759 |
| N                            | 2.091806  | 7.039482  | 16.429376 | H | 0.957691  | 8.066909  | 19.457196 |
| C                            | 1.238120  | 7.181047  | 17.508531 | H | 2.704354  | 10.102741 | 21.795284 |
| C                            | 1.652809  | 7.957613  | 18.627024 | H | 1.389892  | 9.963348  | 20.609800 |
| C                            | 2.892339  | 8.553098  | 18.682236 | H | 2.062596  | 8.500438  | 21.379074 |
| C                            | 3.370082  | 9.392783  | 19.863088 | H | 5.009472  | 9.354985  | 21.295126 |
| C                            | 2.316852  | 9.489459  | 20.967779 | H | 4.434562  | 7.736622  | 20.818617 |
| C                            | 4.639686  | 8.753633  | 20.449641 | H | 5.449098  | 8.688729  | 19.707253 |
| C                            | 3.692500  | 10.812130 | 19.366660 | H | 4.051906  | 11.432497 | 20.202839 |
| C                            | 3.751427  | 8.354638  | 17.556909 | H | 2.797410  | 11.294611 | 18.944057 |
| C                            | 3.313701  | 7.608449  | 16.489567 | H | 4.474330  | 10.809818 | 18.592574 |
|                              |           |           |           | H | 4.749848  | 8.790338  | 17.513116 |

|                              |           |           |           |   |           |           |           |
|------------------------------|-----------|-----------|-----------|---|-----------|-----------|-----------|
| H                            | -1.553162 | 4.613332  | 15.164901 | C | 0.425752  | 4.791078  | 13.429988 |
| H                            | -3.356571 | 4.673332  | 16.815746 | C | -0.404332 | 5.568855  | 12.568720 |
| H                            | -0.831819 | 7.140318  | 19.310286 | C | -1.110831 | 4.928222  | 11.538337 |
| H                            | -5.434154 | 6.598266  | 19.393156 | C | -1.034757 | 3.563403  | 11.321237 |
| H                            | -4.427261 | 7.613196  | 18.328887 | C | -0.215830 | 2.828795  | 12.174305 |
| H                            | -4.960843 | 6.003102  | 17.786929 | C | 0.505502  | 3.409216  | 13.207956 |
| H                            | -3.800364 | 6.790258  | 21.239314 | C | -0.435386 | 6.996283  | 12.856653 |
| H                            | -2.084900 | 6.384784  | 21.027312 | C | -1.165149 | 7.977080  | 12.163935 |
| H                            | -2.763612 | 7.843234  | 20.254833 | C | -1.092711 | 9.302009  | 12.553934 |
| H                            | -4.465148 | 4.527827  | 20.488440 | C | -0.286702 | 9.645479  | 13.642944 |
| H                            | -2.767332 | 4.065765  | 20.203423 | C | 0.412071  | 8.642375  | 14.294315 |
| H                            | -3.972361 | 3.889835  | 18.904261 | N | 0.343757  | 7.360448  | 13.915416 |
| H                            | 5.507771  | 2.962818  | 15.273142 | N | 2.079972  | 7.076019  | 16.450371 |
| H                            | 4.691894  | 1.536241  | 17.130221 | C | 1.224881  | 7.204980  | 17.529239 |
| H                            | 0.983888  | 3.746896  | 17.028494 | C | 1.623837  | 8.005655  | 18.639004 |
| H                            | 6.415349  | 5.981060  | 11.817393 | C | 2.842824  | 8.646591  | 18.675305 |
| H                            | -1.664196 | 2.947265  | 10.672209 | C | 3.298835  | 9.516688  | 19.844632 |
| H                            | 1.123470  | 2.718273  | 13.938154 | C | 2.252778  | 9.586926  | 20.958339 |
| H                            | 3.956492  | 7.462266  | 15.619274 | C | 4.595952  | 8.933444  | 20.428897 |
| H                            | 2.522948  | 7.696152  | 12.453792 | C | 3.564471  | 10.942217 | 19.333043 |
| F                            | -1.987688 | 5.482025  | 10.807251 | C | 3.698536  | 8.470422  | 17.545494 |
| F                            | -0.165383 | 1.414643  | 12.140213 | C | 3.271336  | 7.692709  | 16.489835 |
| C                            | -0.320772 | 11.016847 | 14.082787 | C | -0.021065 | 6.518037  | 17.441321 |
| F                            | -1.532474 | 11.525447 | 14.314457 | N | -0.244233 | 5.786407  | 16.289449 |
| F                            | 0.246055  | 11.767091 | 13.134459 | C | -1.407207 | 5.130543  | 16.153011 |
| F                            | 0.401294  | 11.156533 | 15.194157 | C | -2.402861 | 5.126705  | 17.107088 |
| F                            | 4.706086  | 7.803269  | 11.103864 | C | -2.211344 | 5.855300  | 18.320425 |
| F                            | 6.184547  | 4.182060  | 13.622657 | C | -1.021524 | 6.536381  | 18.456467 |
| C                            | 2.237409  | 1.684342  | 18.346809 | C | -3.300777 | 5.847496  | 19.390707 |
| F                            | 3.056139  | 1.718304  | 19.400353 | C | -4.597205 | 6.418210  | 18.792694 |
| F                            | 2.129943  | 0.406731  | 17.973827 | C | -2.919815 | 6.684653  | 20.612781 |
| F                            | 1.034702  | 2.091630  | 18.750721 | C | -3.542818 | 4.399017  | 19.846566 |
|                              |           |           |           | N | 2.382856  | 4.288616  | 15.676377 |
| <b>[Ir(II)]</b>              |           |           |           | C | 3.612186  | 4.038140  | 15.141080 |
| <b>0 imaginary frequency</b> |           |           |           | C | 3.971638  | 4.934552  | 14.050851 |
| Ir                           | 1.342083  | 5.853673  | 14.871033 | C | 5.174724  | 4.899373  | 13.327904 |

|   |           |           |           |                              |           |           |           |
|---|-----------|-----------|-----------|------------------------------|-----------|-----------|-----------|
| C | 5.451437  | 5.784872  | 12.300816 | H                            | 0.933311  | 3.802051  | 17.066360 |
| C | 4.477146  | 6.732222  | 11.998642 | H                            | 6.394161  | 5.736286  | 11.756210 |
| C | 3.270583  | 6.812714  | 12.679327 | H                            | -1.594713 | 3.091070  | 10.514377 |
| C | 2.991615  | 5.917879  | 13.721758 | H                            | 1.126059  | 2.762059  | 13.830964 |
| C | 4.391118  | 2.988146  | 15.655935 | H                            | 3.907041  | 7.549890  | 15.611825 |
| C | 3.913776  | 2.215404  | 16.698835 | H                            | 2.559572  | 7.584923  | 12.379147 |
| C | 2.651365  | 2.496677  | 17.228867 | F                            | -1.897997 | 5.630367  | 10.716920 |
| C | 1.921889  | 3.542502  | 16.687583 | F                            | -0.128233 | 1.513010  | 11.980051 |
| H | -1.786569 | 7.686915  | 11.321182 | C                            | -0.175764 | 11.074402 | 14.088222 |
| H | -1.661170 | 10.063404 | 12.015558 | F                            | -1.379586 | 11.599846 | 14.340137 |
| H | 1.052120  | 8.858462  | 15.149728 | F                            | 0.387464  | 11.837231 | 13.144010 |
| H | 0.932590  | 8.104204  | 19.474177 | F                            | 0.558843  | 11.200271 | 15.194814 |
| H | 2.624442  | 10.222381 | 21.776622 | F                            | 4.724583  | 7.593036  | 11.011483 |
| H | 1.305856  | 10.022303 | 20.603690 | F                            | 6.113016  | 3.991407  | 13.615394 |
| H | 2.037569  | 8.593423  | 21.381025 | C                            | 2.099982  | 1.676979  | 18.358754 |
| H | 4.950830  | 9.557344  | 21.264714 | F                            | 2.920413  | 1.690819  | 19.415149 |
| H | 4.431996  | 7.913577  | 20.810706 | F                            | 1.951144  | 0.395511  | 18.003805 |
| H | 5.400462  | 8.889236  | 19.679709 | F                            | 0.909970  | 2.120510  | 18.767411 |
| H | 3.906506  | 11.585629 | 20.159374 |                              |           |           |           |
| H | 2.648878  | 11.386023 | 18.911615 |                              |           |           |           |
| H | 4.339486  | 10.960058 | 18.552313 |                              |           |           |           |
| H | 4.682259  | 8.937760  | 17.491247 |                              |           |           |           |
| H | -1.529889 | 4.574302  | 15.219740 |                              |           |           |           |
| H | -3.315603 | 4.562337  | 16.913631 |                              |           |           |           |
| H | -0.823368 | 7.109317  | 19.360652 |                              |           |           |           |
| H | -5.401037 | 6.405836  | 19.545996 |                              |           |           |           |
| H | -4.454153 | 7.459568  | 18.464222 |                              |           |           |           |
| H | -4.942075 | 5.834204  | 17.926386 |                              |           |           |           |
| H | -3.732906 | 6.650273  | 21.353866 |                              |           |           |           |
| H | -2.009130 | 6.305157  | 21.101284 |                              |           |           |           |
| H | -2.754529 | 7.740853  | 20.349824 |                              |           |           |           |
| H | -4.334537 | 4.368145  | 20.612094 |                              |           |           |           |
| H | -2.629137 | 3.966029  | 20.283102 |                              |           |           |           |
| H | -3.858166 | 3.753955  | 19.012901 |                              |           |           |           |
| H | 5.370246  | 2.788930  | 15.229132 |                              |           |           |           |
| H | 4.520243  | 1.399758  | 17.098379 |                              |           |           |           |
|   |           |           |           | <b>PPh<sub>3</sub></b>       |           |           |           |
|   |           |           |           | <b>0 imaginary frequency</b> |           |           |           |
|   |           |           |           | P                            | -2.618839 | 2.041031  | 0.152469  |
|   |           |           |           | C                            | -1.666780 | 2.694355  | 1.587862  |
|   |           |           |           | C                            | -2.154771 | 2.388485  | 2.867942  |
|   |           |           |           | C                            | -0.517531 | 3.487967  | 1.475855  |
|   |           |           |           | C                            | -1.497695 | 2.846366  | 4.008522  |
|   |           |           |           | H                            | -3.062016 | 1.785319  | 2.972116  |
|   |           |           |           | C                            | 0.132812  | 3.956976  | 2.618265  |
|   |           |           |           | H                            | -0.125850 | 3.742725  | 0.487944  |
|   |           |           |           | C                            | -0.352397 | 3.634981  | 3.885673  |
|   |           |           |           | H                            | -1.887958 | 2.595300  | 4.998084  |
|   |           |           |           | H                            | 1.027410  | 4.576609  | 2.515547  |
|   |           |           |           | H                            | 0.158737  | 4.002903  | 4.778827  |
|   |           |           |           | C                            | -1.897827 | 2.979763  | -1.259110 |
|   |           |           |           | C                            | -2.463342 | 4.232033  | -1.545959 |
|   |           |           |           | C                            | -0.851932 | 2.511251  | -2.065213 |



|   |           |           |           |   |           |           |           |
|---|-----------|-----------|-----------|---|-----------|-----------|-----------|
| C | -1.981003 | 5.006638  | -2.599360 | C | -0.923080 | 2.447820  | -2.439274 |
| H | -3.293245 | 4.603980  | -0.937136 | C | -1.870957 | 5.084433  | -2.544373 |
| C | -0.377818 | 3.281774  | -3.128051 | H | -2.696525 | 4.733494  | -0.586866 |
| H | -0.402714 | 1.535943  | -1.862068 | C | -0.684998 | 3.231432  | -3.562941 |
| C | -0.937524 | 4.531062  | -3.395414 | H | -0.542779 | 1.425343  | -2.396059 |
| H | -2.429233 | 5.981707  | -2.806466 | C | -1.155597 | 4.544999  | -3.616398 |
| H | 0.437491  | 2.902711  | -3.749644 | H | -2.243607 | 6.109578  | -2.592294 |
| H | -0.564428 | 5.132905  | -4.227843 | H | -0.121823 | 2.814894  | -4.400563 |
| C | -1.889513 | 0.364776  | -0.075057 | H | -0.965583 | 5.153889  | -4.503190 |
| C | -2.573770 | -0.516997 | -0.926339 | C | -1.635723 | 0.287698  | -0.078509 |
| C | -0.724977 | -0.081400 | 0.563499  | C | -2.286259 | -0.426321 | -1.103922 |
| C | -2.093705 | -1.805920 | -1.151007 | C | -0.763805 | -0.374549 | 0.804971  |
| H | -3.495163 | -0.189863 | -1.418047 | C | -2.041136 | -1.785619 | -1.253892 |
| C | -0.251767 | -1.376754 | 0.348310  | H | -2.983375 | 0.078241  | -1.777222 |
| H | -0.181744 | 0.588069  | 1.235037  | C | -0.532710 | -1.736115 | 0.643373  |
| C | -0.931436 | -2.239897 | -0.510989 | H | -0.256286 | 0.174855  | 1.600241  |
| H | -2.635676 | -2.478569 | -1.820627 | C | -1.167576 | -2.440123 | -0.381861 |
| H | 0.657148  | -1.711736 | 0.854731  | H | -2.541155 | -2.340257 | -2.050410 |
| H | -0.558800 | -3.253538 | -0.678390 | H | 0.153648  | -2.249811 | 1.319606  |
|   |           |           |           | H | -0.982170 | -3.509970 | -0.501311 |

**\*+PPh<sub>3</sub>**

**0 imaginary frequency**

|   |           |          |           |
|---|-----------|----------|-----------|
| P | -1.981498 | 2.024508 | 0.097034  |
| C | -1.398054 | 2.739229 | 1.618687  |
| C | -1.843269 | 2.184783 | 2.834955  |
| C | -0.544182 | 3.857395 | 1.618792  |
| C | -1.411871 | 2.733070 | 4.036357  |
| H | -2.526102 | 1.331749 | 2.840156  |
| C | -0.125208 | 4.396435 | 2.830069  |
| H | -0.195223 | 4.289959 | 0.679121  |
| C | -0.555838 | 3.837255 | 4.034937  |
| H | -1.752119 | 2.302208 | 4.980127  |
| H | 0.548118  | 5.256050 | 2.832806  |
| H | -0.223465 | 4.267385 | 4.982440  |
| C | -1.634308 | 2.993273 | -1.354844 |
| C | -2.121342 | 4.313747 | -1.415778 |

**[NHPI---P(OEt)<sub>3</sub>]**

**0 imaginary frequency**

|   |          |           |           |
|---|----------|-----------|-----------|
| C | 1.877004 | -6.045288 | -1.685900 |
| C | 2.594605 | -6.562719 | -0.603731 |
| C | 3.662781 | -7.425169 | -0.789619 |
| C | 4.000906 | -7.757890 | -2.107533 |
| C | 3.283113 | -7.240873 | -3.189697 |
| C | 2.201863 | -6.372558 | -2.992394 |
| C | 0.794924 | -5.168342 | -1.159889 |
| C | 1.997107 | -6.037457 | 0.654763  |
| H | 4.218383 | -7.827816 | 0.059816  |
| H | 4.839033 | -8.433069 | -2.294184 |
| H | 3.571060 | -7.519755 | -4.205811 |
| H | 1.636239 | -5.967091 | -3.833844 |
| N | 0.930390 | -5.243174 | 0.228531  |

|                                                |           |           |           |   |           |           |           |
|------------------------------------------------|-----------|-----------|-----------|---|-----------|-----------|-----------|
| O                                              | 0.218632  | -4.473163 | 1.069938  | C | 4.549358  | -6.402020 | -2.471118 |
| H                                              | -0.589309 | -5.001562 | 1.300958  | C | 3.910245  | -5.209388 | -2.119559 |
| O                                              | -0.043063 | -4.530767 | -1.746592 | C | 1.814414  | -4.227207 | -0.969725 |
| O                                              | 2.309944  | -6.232182 | 1.802728  | C | 0.853444  | -6.351308 | -0.444784 |
| P                                              | -2.218075 | -6.515360 | 1.670463  | H | 2.317361  | -8.706572 | -1.251190 |
| O                                              | -1.921002 | -7.591036 | 2.860017  | H | 4.511295  | -8.558032 | -2.452629 |
| O                                              | -2.559961 | -7.548627 | 0.452248  | H | 5.506736  | -6.364526 | -2.995122 |
| O                                              | -3.748867 | -6.089085 | 2.052105  | H | 4.346640  | -4.237396 | -2.356751 |
| C                                              | -0.571235 | -7.867148 | 3.246453  | N | 0.700001  | -4.924730 | -0.359801 |
| H                                              | 0.061083  | -6.978666 | 3.071222  | O | -0.272499 | -4.356017 | 0.171851  |
| H                                              | -0.596422 | -8.045404 | 4.331809  | H | -1.784673 | -5.707470 | 1.084919  |
| C                                              | -0.015509 | -9.065344 | 2.513034  | O | 1.898787  | -3.036045 | -1.014119 |
| H                                              | 0.028891  | -8.880326 | 1.428938  | O | 0.047080  | -7.124474 | -0.000171 |
| H                                              | 1.003607  | -9.283996 | 2.865749  | P | -2.693291 | -6.684323 | 1.530301  |
| H                                              | -0.640854 | -9.954196 | 2.684906  | O | -2.195501 | -7.375687 | 2.839773  |
| C                                              | -2.858453 | -7.009787 | -0.837522 | O | -2.913559 | -7.778076 | 0.434430  |
| H                                              | -3.941639 | -6.810382 | -0.893466 | O | -4.097443 | -6.065919 | 1.844661  |
| H                                              | -2.338847 | -6.043622 | -0.975727 | C | -0.856676 | -7.885969 | 3.104780  |
| C                                              | -2.432643 | -7.994014 | -1.897391 | H | -0.124572 | -7.217146 | 2.629471  |
| H                                              | -2.934542 | -8.962503 | -1.753404 | H | -0.751910 | -7.798495 | 4.193183  |
| H                                              | -2.697257 | -7.613071 | -2.894877 | C | -0.714789 | -9.307496 | 2.633123  |
| H                                              | -1.344908 | -8.157503 | -1.865725 | H | -0.790853 | -9.375700 | 1.539008  |
| C                                              | -3.968681 | -5.070044 | 3.026965  | H | 0.274786  | -9.683836 | 2.931822  |
| H                                              | -3.869897 | -5.510529 | 4.033658  | H | -1.479956 | -9.951649 | 3.089383  |
| H                                              | -3.195244 | -4.285531 | 2.933831  | C | -3.153176 | -7.486569 | -0.971007 |
| C                                              | -5.344705 | -4.487184 | 2.826866  | H | -4.215228 | -7.221522 | -1.072382 |
| H                                              | -6.114905 | -5.267296 | 2.920302  | H | -2.541640 | -6.617792 | -1.259629 |
| H                                              | -5.542008 | -3.714665 | 3.584651  | C | -2.793198 | -8.706202 | -1.770521 |
| H                                              | -5.433475 | -4.028418 | 1.830898  | H | -3.389962 | -9.573312 | -1.453431 |
|                                                |           |           |           | H | -3.000052 | -8.514265 | -2.833273 |
|                                                |           |           |           | H | -1.725960 | -8.944619 | -1.659784 |
|                                                |           |           |           | C | -4.343348 | -5.040677 | 2.847263  |
|                                                |           |           |           | H | -4.058274 | -5.453599 | 3.825738  |
|                                                |           |           |           | H | -3.700600 | -4.174769 | 2.625601  |
|                                                |           |           |           | C | -5.800404 | -4.678870 | 2.792661  |
|                                                |           |           |           | H | -6.430605 | -5.553753 | 3.006827  |
| <b>[PINO--HP(OEt)<sub>3</sub>]<sup>+</sup></b> |           |           |           |   |           |           |           |
| <b>0 imaginary frequency</b>                   |           |           |           |   |           |           |           |
| C                                              | 2.696174  | -5.305463 | -1.454767 |   |           |           |           |
| C                                              | 2.130110  | -6.553107 | -1.146681 |   |           |           |           |
| C                                              | 2.761936  | -7.739675 | -1.493865 |   |           |           |           |
| C                                              | 3.984929  | -7.646005 | -2.163539 |   |           |           |           |

|                              |           |           |           |                              |           |           |           |
|------------------------------|-----------|-----------|-----------|------------------------------|-----------|-----------|-----------|
| H                            | -6.008182 | -3.908310 | 3.548953  | H                            | 1.804345  | 0.505297  | 0.002394  |
| H                            | -6.070128 | -4.277502 | 1.805461  | N                            | -0.732861 | -2.840005 | 0.007844  |
| <b>NHPI</b>                  |           |           |           | O                            | -0.709422 | -4.111461 | 0.011895  |
| <b>0 imaginary frequency</b> |           |           |           | H                            | 0.247087  | -4.381302 | 0.014582  |
| C                            | -0.018227 | -0.662633 | 0.003474  | O                            | 1.547278  | -2.594720 | 0.007617  |
| C                            | -1.418156 | -0.662608 | 0.001993  | O                            | -3.048410 | -2.520817 | 0.003666  |
| C                            | -2.138453 | 0.518410  | -0.001164 | <b>NHPI(triplet)</b>         |           |           |           |
| C                            | -1.412501 | 1.718475  | -0.002869 | C                            | 0.004255  | -0.712299 | 0.003813  |
| C                            | -0.016404 | 1.717619  | -0.001423 | C                            | -1.449462 | -0.704337 | 0.002225  |
| C                            | 0.706816  | 0.516380  | 0.001799  | C                            | -2.147094 | 0.519890  | -0.001126 |
| C                            | 0.436443  | -2.076374 | 0.007002  | C                            | -1.427106 | 1.693941  | -0.002891 |
| C                            | -1.903808 | -2.076161 | 0.004454  | C                            | 0.007935  | 1.686208  | -0.001398 |
| H                            | -3.230374 | 0.513849  | -0.002272 | C                            | 0.718004  | 0.510110  | 0.001897  |
| H                            | -1.948005 | 2.670474  | -0.005358 | C                            | 0.469117  | -2.046790 | 0.007155  |
| H                            | 0.520807  | 2.668579  | -0.002803 | C                            | -1.989248 | -2.031705 | 0.004420  |
| H                            | 1.798617  | 0.510204  | 0.002966  | H                            | -3.239209 | 0.524933  | -0.002267 |
| N                            | -0.731702 | -2.821349 | 0.007424  | H                            | -1.950691 | 2.652332  | -0.005480 |
| O                            | -0.716162 | -4.171881 | 0.010199  | H                            | 0.540257  | 2.639973  | -0.002930 |
| H                            | 0.236382  | -4.384044 | 0.011645  | H                            | 1.809779  | 0.507733  | 0.003018  |
| O                            | 1.535455  | -2.582640 | 0.009190  | N                            | -0.762496 | -2.814593 | 0.007374  |
| O                            | -3.025059 | -2.516411 | 0.004181  | O                            | -0.661519 | -4.089730 | 0.009835  |
| <b>**NHPI</b>                |           |           |           | H                            | 0.337997  | -4.214630 | 0.011066  |
| <b>0 imaginary frequency</b> |           |           |           | O                            | 1.511430  | -2.704119 | 0.009572  |
| C                            | -0.010424 | -0.674080 | 0.002607  | O                            | -3.096281 | -2.537030 | 0.004154  |
| C                            | -1.427681 | -0.674369 | 0.001267  | <b>P(OEt)<sub>3</sub></b>    |           |           |           |
| C                            | -2.145098 | 0.513067  | -0.001440 | <b>0 imaginary frequency</b> |           |           |           |
| C                            | -1.416054 | 1.704092  | -0.002624 | P                            | -2.815952 | 2.002048  | 0.274987  |
| C                            | -0.011346 | 1.703460  | -0.001293 | O                            | -2.097392 | 0.539914  | -0.048683 |
| C                            | 0.713489  | 0.511226  | 0.001252  | O                            | -1.893153 | 2.605387  | 1.477711  |
| C                            | 0.489734  | -2.043527 | 0.005920  | O                            | -2.120428 | 2.826787  | -0.973637 |
| C                            | -1.963170 | -2.042080 | 0.003759  | C                            | -2.623777 | -0.634637 | 0.556809  |
| H                            | -3.236118 | 0.511328  | -0.002365 | H                            | -2.054188 | -0.850160 | 1.477497  |
| H                            | -1.947544 | 2.657747  | -0.004492 | H                            | -3.674794 | -0.467907 | 0.859468  |
| H                            | 0.521864  | 2.656035  | -0.002152 | C                            | -2.528915 | -1.790023 | -0.409770 |

|                                       |           |           |           |                                  |           |           |           |
|---------------------------------------|-----------|-----------|-----------|----------------------------------|-----------|-----------|-----------|
| H                                     | -1.484843 | -1.957617 | -0.714597 | H                                | 0.757061  | 3.767774  | 3.109043  |
| H                                     | -2.902639 | -2.712545 | 0.059342  | H                                | 0.171147  | 2.110721  | 3.407950  |
| H                                     | -3.125499 | -1.593197 | -1.313309 | C                                | -2.630444 | 2.800312  | -2.409630 |
| C                                     | -0.466400 | 2.670440  | 1.414042  | H                                | -2.892743 | 1.785252  | -2.739842 |
| H                                     | -0.080534 | 1.771178  | 0.906727  | H                                | -3.550545 | 3.382544  | -2.259397 |
| H                                     | -0.177915 | 3.544262  | 0.807608  | C                                | -1.680929 | 3.477362  | -3.355842 |
| C                                     | 0.080103  | 2.777933  | 2.815593  | H                                | -0.762312 | 2.887776  | -3.484052 |
| H                                     | -0.192350 | 1.894141  | 3.411885  | H                                | -2.169833 | 3.575287  | -4.336037 |
| H                                     | 1.177604  | 2.852848  | 2.789366  | H                                | -1.416794 | 4.482780  | -2.998862 |
| H                                     | -0.313835 | 3.671662  | 3.322605  |                                  |           |           |           |
| C                                     | -2.624276 | 2.629434  | -2.288071 | <b>POEt<sub>3</sub>(triplet)</b> |           |           |           |
| H                                     | -2.266986 | 1.659152  | -2.675073 | P                                | -1.483822 | 1.594686  | 0.016280  |
| H                                     | -3.729828 | 2.584392  | -2.268103 | O                                | -2.043206 | 0.158807  | -0.775143 |
| C                                     | -2.158404 | 3.761312  | -3.170029 | O                                | -0.878224 | 2.842742  | 1.044390  |
| H                                     | -1.059205 | 3.806049  | -3.196648 | O                                | -1.592312 | 2.570634  | -1.287407 |
| H                                     | -2.522944 | 3.617956  | -4.198039 | C                                | -2.401598 | -0.966196 | 0.005097  |
| H                                     | -2.535146 | 4.726092  | -2.798767 | H                                | -1.528277 | -1.333413 | 0.575420  |
|                                       |           |           |           | H                                | -3.179090 | -0.691631 | 0.741962  |
| <b><sup>+</sup>P(OEt)<sub>3</sub></b> |           |           |           | C                                | -2.909568 | -2.046515 | -0.920679 |
| <b>0 imaginary frequency</b>          |           |           |           | H                                | -2.134240 | -2.334127 | -1.646577 |
| P                                     | -2.461538 | 1.864356  | 0.126055  | H                                | -3.191554 | -2.939913 | -0.343488 |
| O                                     | -2.566255 | 0.356099  | -0.312390 | H                                | -3.793751 | -1.700937 | -1.477193 |
| O                                     | -1.357424 | 1.966619  | 1.243716  | C                                | -0.292604 | 2.481060  | 2.281862  |
| O                                     | -1.960934 | 2.692260  | -1.115975 | H                                | -1.040557 | 1.998537  | 2.938210  |
| C                                     | -2.902151 | -0.773370 | 0.551062  | H                                | 0.521712  | 1.749475  | 2.124658  |
| H                                     | -2.214779 | -0.754234 | 1.408541  | C                                | 0.242773  | 3.733526  | 2.935410  |
| H                                     | -3.931432 | -0.627907 | 0.908176  | H                                | -0.566032 | 4.458946  | 3.109776  |
| C                                     | -2.760285 | -2.025653 | -0.265169 | H                                | 0.703714  | 3.489762  | 3.904384  |
| H                                     | -1.729579 | -2.147909 | -0.626528 | H                                | 1.003762  | 4.210291  | 2.299522  |
| H                                     | -3.010501 | -2.889500 | 0.367688  | C                                | -2.761893 | 2.597243  | -2.103374 |
| H                                     | -3.444863 | -2.016532 | -1.124994 | H                                | -2.886190 | 1.623029  | -2.602320 |
| C                                     | -0.868849 | 3.196737  | 1.862134  | H                                | -3.652074 | 2.760588  | -1.469386 |
| H                                     | -0.679009 | 3.926424  | 1.062285  | C                                | -2.609266 | 3.707497  | -3.112041 |
| H                                     | -1.665588 | 3.575300  | 2.517587  | H                                | -1.723575 | 3.541117  | -3.743500 |
| C                                     | 0.378107  | 2.855202  | 2.626312  | H                                | -3.494561 | 3.747676  | -3.764005 |
| H                                     | 1.158775  | 2.467201  | 1.957082  | H                                | -2.501262 | 4.682017  | -2.612944 |

---

**<sup>+</sup>HP(OEt)<sub>3</sub>****0 imaginary frequency**

|   |           |           |           |
|---|-----------|-----------|-----------|
| P | -2.676887 | 1.950730  | 0.282885  |
| O | -2.413575 | 0.495295  | -0.233892 |
| O | -1.795211 | 2.389452  | 1.491606  |
| O | -2.357993 | 2.900646  | -0.913483 |
| C | -2.742912 | -0.739312 | 0.467781  |
| H | -2.070517 | -0.819836 | 1.333763  |
| H | -3.780798 | -0.668537 | 0.827276  |
| C | -2.563028 | -1.879508 | -0.492962 |
| H | -1.525751 | -1.930198 | -0.853213 |
| H | -2.796652 | -2.821966 | 0.023008  |
| H | -3.237530 | -1.779184 | -1.355084 |
| C | -0.345350 | 2.562069  | 1.453853  |
| H | 0.102217  | 1.602381  | 1.157804  |
| H | -0.121268 | 3.314431  | 0.684642  |
| C | 0.102964  | 2.995958  | 2.819349  |
| H | -0.141770 | 2.236839  | 3.575642  |
| H | 1.193574  | 3.135563  | 2.808776  |
| H | -0.365494 | 3.948889  | 3.103405  |
| C | -2.737976 | 2.695807  | -2.306322 |
| H | -2.407347 | 1.689846  | -2.600202 |
| H | -3.835031 | 2.744571  | -2.366160 |
| C | -2.083430 | 3.770841  | -3.125159 |
| H | -0.988433 | 3.715631  | -3.045554 |
| H | -2.361602 | 3.634340  | -4.180184 |
| H | -2.416056 | 4.768678  | -2.805951 |
| H | -3.985520 | 2.074246  | 0.761987  |

**PINO****0 imaginary frequency**

|   |           |           |           |
|---|-----------|-----------|-----------|
| C | -0.018028 | -0.660077 | -0.000000 |
| C | -1.420557 | -0.660077 | -0.000000 |
| C | -2.142403 | 0.525656  | -0.000000 |
| C | -1.419350 | 1.721774  | 0.000000  |

|   |           |           |           |
|---|-----------|-----------|-----------|
| C | -0.019235 | 1.721774  | 0.000000  |
| C | 0.703818  | 0.525656  | 0.000000  |
| C | 0.475913  | -2.050910 | -0.000000 |
| C | -1.914498 | -2.050910 | -0.000000 |
| H | -3.234029 | 0.519222  | -0.000000 |
| H | -1.953957 | 2.674141  | 0.000000  |
| H | 0.515373  | 2.674141  | 0.000000  |
| H | 1.795444  | 0.519222  | -0.000000 |
| N | -0.719292 | -2.859999 | 0.000000  |
| O | -0.719292 | -4.105397 | 0.000000  |
| O | 1.583358  | -2.505760 | -0.000000 |
| O | -3.021942 | -2.505760 | -0.000000 |

**O=P(OEt)<sub>3</sub>****0 imaginary frequency**

|   |           |           |           |
|---|-----------|-----------|-----------|
| O | -0.025344 | -4.512670 | 0.148633  |
| P | -0.013131 | -5.977641 | -0.060165 |
| O | -0.536698 | -6.534159 | -1.464338 |
| O | -0.917985 | -6.819259 | 0.968090  |
| O | 1.458594  | -6.586568 | 0.006698  |
| C | -1.867934 | -6.243411 | -1.914254 |
| H | -2.579065 | -6.827450 | -1.307696 |
| H | -2.076587 | -5.173860 | -1.748205 |
| C | -1.972075 | -6.597734 | -3.374112 |
| H | -1.756223 | -7.664389 | -3.534625 |
| H | -2.990819 | -6.393852 | -3.734845 |
| H | -1.266396 | -6.003642 | -3.973071 |
| C | -1.054835 | -6.412318 | 2.337358  |
| H | -0.187716 | -6.790720 | 2.903329  |
| H | -1.037755 | -5.312203 | 2.384972  |
| C | -2.344139 | -6.967804 | 2.883466  |
| H | -2.357157 | -8.066060 | 2.821336  |
| H | -2.455466 | -6.681415 | 3.939642  |
| H | -3.207081 | -6.575709 | 2.325128  |
| C | 1.721171  | -7.987118 | -0.162300 |
| H | 1.019556  | -8.563419 | 0.462375  |

|                                      |           |           |           |                              |           |           |           |
|--------------------------------------|-----------|-----------|-----------|------------------------------|-----------|-----------|-----------|
| H                                    | 1.535955  | -8.253912 | -1.214822 | H                            | 2.444043  | -6.714739 | 0.441177  |
| C                                    | 3.149604  | -8.258290 | 0.230155  | H                            | 1.355209  | -5.410620 | 0.992644  |
| H                                    | 3.323673  | -7.998306 | 1.284670  | C                            | 0.874448  | -7.362589 | 1.781085  |
| H                                    | 3.375993  | -9.326003 | 0.094534  | H                            | 0.888606  | -8.417833 | 1.469205  |
| H                                    | 3.844566  | -7.676098 | -0.392763 | H                            | 1.498971  | -7.260919 | 2.681184  |
| <b>TS1</b>                           |           |           |           | H                            | -0.158815 | -7.089913 | 2.042994  |
| <b>1 imaginary frequency, 110.9i</b> |           |           |           | C                            | 1.882179  | -4.878114 | -3.649632 |
| C                                    | -0.228871 | -0.964902 | 0.798885  | H                            | 1.175477  | -5.109571 | -4.464989 |
| C                                    | -1.335282 | -0.876184 | -0.054150 | H                            | 1.700765  | -3.830907 | -3.345850 |
| C                                    | -1.869963 | 0.349554  | -0.419354 | C                            | 3.307867  | -5.060105 | -4.106404 |
| C                                    | -1.260978 | 1.499158  | 0.097445  | H                            | 3.489191  | -6.101760 | -4.410855 |
| C                                    | -0.155695 | 1.410555  | 0.949680  | H                            | 3.515864  | -4.407913 | -4.967535 |
| C                                    | 0.378966  | 0.169323  | 1.314450  | H                            | 4.011887  | -4.806647 | -3.299847 |
| C                                    | 0.105550  | -2.395151 | 0.999259  | <b>I</b>                     |           |           |           |
| C                                    | -1.756471 | -2.245480 | -0.435601 | <b>0 imaginary frequency</b> |           |           |           |
| H                                    | -2.732729 | 0.412515  | -1.085498 | C                            | 0.269428  | -1.299167 | 0.386714  |
| H                                    | -1.654495 | 2.482691  | -0.168645 | C                            | -0.638203 | -1.201749 | -0.723238 |
| H                                    | 0.297139  | 2.326246  | 1.336250  | C                            | -0.904393 | 0.050374  | -1.307968 |
| H                                    | 1.241973  | 0.094200  | 1.979005  | C                            | -0.288160 | 1.175141  | -0.788379 |
| N                                    | -0.873065 | -3.104444 | 0.261484  | C                            | 0.605319  | 1.079232  | 0.313371  |
| O                                    | -0.899018 | -4.380462 | 0.170729  | C                            | 0.886417  | -0.144790 | 0.897169  |
| O                                    | 0.995834  | -2.912864 | 1.621869  | C                            | 0.393433  | -2.678843 | 0.795105  |
| O                                    | -2.634382 | -2.618399 | -1.169722 | C                            | -1.120280 | -2.512493 | -1.061709 |
| P                                    | 0.377468  | -5.435654 | -1.535274 | H                            | -1.589810 | 0.126459  | -2.156255 |
| O                                    | -0.816992 | -6.069101 | -2.445575 | H                            | -0.488374 | 2.154994  | -1.229454 |
| O                                    | 0.602757  | -6.662185 | -0.489546 | H                            | 1.076012  | 1.986344  | 0.700745  |
| O                                    | 1.629911  | -5.754347 | -2.553729 | H                            | 1.576103  | -0.219207 | 1.742283  |
| C                                    | -2.189567 | -6.060978 | -2.045659 | N                            | -0.456262 | -3.328476 | -0.123943 |
| H                                    | -2.297392 | -6.648801 | -1.118316 | O                            | -0.750023 | -4.654448 | 0.001328  |
| H                                    | -2.504630 | -5.029386 | -1.823481 | O                            | 1.036360  | -3.262350 | 1.670851  |
| C                                    | -3.009704 | -6.660020 | -3.160157 | O                            | -1.859921 | -2.973933 | -1.944892 |
| H                                    | -2.694539 | -7.692874 | -3.371325 | P                            | -0.088740 | -5.702863 | -1.030791 |
| H                                    | -4.072998 | -6.673848 | -2.877868 | O                            | -1.152321 | -6.252120 | -2.013487 |
| H                                    | -2.905695 | -6.070081 | -4.083280 | O                            | 0.424810  | -6.877341 | -0.155305 |
| C                                    | 1.396393  | -6.468866 | 0.684414  | O                            | 1.092021  | -5.063267 | -1.804857 |

|                                       |           |           |           |                              |           |           |           |
|---------------------------------------|-----------|-----------|-----------|------------------------------|-----------|-----------|-----------|
| C                                     | -2.610859 | -6.177338 | -1.868020 | N                            | 0.070652  | -3.254222 | -0.690109 |
| H                                     | -2.883725 | -6.742066 | -0.965784 | O                            | -0.533773 | -4.642889 | -0.316157 |
| H                                     | -2.855572 | -5.114077 | -1.740536 | O                            | 0.954283  | -3.155710 | 1.470562  |
| C                                     | -3.219628 | -6.766051 | -3.106829 | O                            | -1.317773 | -2.856904 | -2.529844 |
| H                                     | -2.928428 | -7.818223 | -3.235403 | P                            | 0.043368  | -5.896766 | -1.073267 |
| H                                     | -4.314779 | -6.718979 | -3.017491 | O                            | -1.044357 | -6.558898 | -1.977072 |
| H                                     | -2.922164 | -6.199189 | -4.000550 | O                            | 0.479377  | -6.959464 | -0.011523 |
| C                                     | 1.354265  | -6.708035 | 0.967957  | O                            | 1.281210  | -5.589875 | -1.965930 |
| H                                     | 2.355015  | -6.916137 | 0.565356  | C                            | -2.473152 | -6.578249 | -1.690504 |
| H                                     | 1.307888  | -5.660656 | 1.306765  | H                            | -2.753993 | -7.639925 | -1.688860 |
| C                                     | 0.962489  | -7.672529 | 2.050026  | H                            | -2.641725 | -6.171117 | -0.683069 |
| H                                     | 0.982041  | -8.709317 | 1.684778  | C                            | -3.201796 | -5.786162 | -2.740530 |
| H                                     | 1.678663  | -7.585694 | 2.880214  | H                            | -3.034854 | -6.214113 | -3.739890 |
| H                                     | -0.042126 | -7.446755 | 2.435151  | H                            | -4.281278 | -5.814552 | -2.530091 |
| C                                     | 1.016577  | -4.282627 | -3.046015 | H                            | -2.860837 | -4.740136 | -2.734762 |
| H                                     | 1.249939  | -4.989238 | -3.853491 | C                            | 1.345373  | -6.654869 | 1.121503  |
| H                                     | -0.013829 | -3.917622 | -3.163492 | H                            | 2.376815  | -6.837440 | 0.786957  |
| C                                     | 2.010640  | -3.160740 | -2.961088 | H                            | 1.233178  | -5.589022 | 1.373529  |
| H                                     | 3.029201  | -3.543590 | -2.804763 | C                            | 0.957966  | -7.548982 | 2.265666  |
| H                                     | 1.993644  | -2.602992 | -3.908943 | H                            | 1.047581  | -8.609258 | 1.988387  |
| H                                     | 1.757858  | -2.465154 | -2.147672 | H                            | 1.628815  | -7.357064 | 3.115813  |
|                                       |           |           |           | H                            | -0.074434 | -7.351377 | 2.588211  |
|                                       |           |           |           | C                            | 1.247419  | -4.869378 | -3.237701 |
|                                       |           |           |           | H                            | 1.155417  | -5.636868 | -4.019209 |
|                                       |           |           |           | H                            | 0.357661  | -4.220948 | -3.255131 |
|                                       |           |           |           | C                            | 2.520464  | -4.082086 | -3.365097 |
|                                       |           |           |           | H                            | 3.401557  | -4.738027 | -3.312259 |
|                                       |           |           |           | H                            | 2.530019  | -3.570084 | -4.338560 |
|                                       |           |           |           | H                            | 2.591261  | -3.323431 | -2.572651 |
|                                       |           |           |           |                              |           |           |           |
|                                       |           |           |           | <b>II</b>                    |           |           |           |
|                                       |           |           |           | <b>0 imaginary frequency</b> |           |           |           |
|                                       |           |           |           | C                            | -0.019176 | -0.639295 | 0.016605  |
|                                       |           |           |           | C                            | -1.419409 | -0.639295 | 0.016607  |
|                                       |           |           |           | C                            | -2.147650 | 0.544793  | 0.018227  |
|                                       |           |           |           | C                            | -1.422302 | 1.736437  | 0.010532  |
|                                       |           |           |           |                              |           |           |           |
| <b>TS2</b>                            |           |           |           |                              |           |           |           |
| <b>1 imaginary frequency, 2044.4i</b> |           |           |           |                              |           |           |           |
| C                                     | 0.077709  | -1.198048 | 0.309111  |                              |           |           |           |
| C                                     | -0.693777 | -1.142624 | -0.885580 |                              |           |           |           |
| C                                     | -1.148845 | 0.107176  | -1.352891 |                              |           |           |           |
| C                                     | -0.883362 | 1.232174  | -0.584311 |                              |           |           |           |
| C                                     | -0.159560 | 1.159937  | 0.627443  |                              |           |           |           |
| C                                     | 0.328102  | -0.067124 | 1.079223  |                              |           |           |           |
| C                                     | 0.455656  | -2.593678 | 0.520516  |                              |           |           |           |
| C                                     | -0.780614 | -2.452236 | -1.482849 |                              |           |           |           |
| H                                     | -1.712847 | 0.181453  | -2.285342 |                              |           |           |           |
| H                                     | -1.249131 | 2.205961  | -0.922043 |                              |           |           |           |
| H                                     | 0.028971  | 2.070454  | 1.199959  |                              |           |           |           |
| H                                     | 0.908154  | -0.141887 | 2.002605  |                              |           |           |           |

|                              |           |           |           |                                        |           |           |           |
|------------------------------|-----------|-----------|-----------|----------------------------------------|-----------|-----------|-----------|
| C                            | -0.016283 | 1.736437  | 0.010532  | C                                      | -2.671527 | 1.447648  | 0.991688  |
| C                            | 0.709065  | 0.544792  | 0.018227  | C                                      | -3.930103 | 0.634231  | 0.679379  |
| C                            | 0.427007  | -2.056167 | 0.021257  | C                                      | -3.624263 | -0.858393 | 0.624847  |
| C                            | -1.865593 | -2.056167 | 0.021265  | H                                      | -0.702361 | 1.767291  | -0.044001 |
| H                            | -3.239303 | 0.539717  | 0.020610  | H                                      | -0.812253 | -0.835162 | 0.793054  |
| H                            | -1.952809 | 2.691214  | 0.002351  | H                                      | -2.915405 | -0.877119 | -1.415349 |
| H                            | 0.514224  | 2.691214  | 0.002351  | H                                      | -2.328226 | -2.244468 | -0.444479 |
| H                            | 1.800718  | 0.539716  | 0.020607  | H                                      | -2.405684 | 1.281904  | 2.059547  |
| N                            | -0.719292 | -2.858576 | 0.246967  | H                                      | -2.869181 | 2.528104  | 0.904363  |
| O                            | 1.538560  | -2.504884 | -0.115065 | H                                      | -4.708083 | 0.842820  | 1.430789  |
| O                            | -2.977143 | -2.504885 | -0.115072 | H                                      | -4.336666 | 0.954823  | -0.295688 |
| <b>Cyclohexene</b>           |           |           |           | H                                      | -3.283501 | -1.201756 | 1.618871  |
| <b>0 imaginary frequency</b> |           |           |           | H                                      | -4.537908 | -1.429749 | 0.396053  |
| C                            | -3.151736 | -0.744594 | -0.009488 | C                                      | 0.919132  | -0.611982 | -3.126124 |
| C                            | -1.683991 | -0.529575 | -0.241912 | C                                      | 1.691650  | -1.283987 | -2.180766 |
| C                            | -0.987651 | 0.466648  | 0.320921  | C                                      | 2.929777  | -1.818832 | -2.501434 |
| C                            | -1.604343 | 1.500986  | 1.217767  | C                                      | 3.376867  | -1.657290 | -3.818251 |
| C                            | -3.129162 | 1.492109  | 1.143109  | C                                      | 2.601409  | -0.982928 | -4.767408 |
| C                            | -3.671820 | 0.067212  | 1.174192  | C                                      | 1.352305  | -0.446565 | -4.432455 |
| H                            | 0.088094  | 0.545921  | 0.125566  | C                                      | -0.340002 | -0.167418 | -2.463675 |
| H                            | -1.170032 | -1.234787 | -0.905377 | C                                      | 0.943636  | -1.283480 | -0.893902 |
| H                            | -3.708497 | -0.480323 | -0.929151 | H                                      | 3.530245  | -2.344237 | -1.755871 |
| H                            | -3.348832 | -1.819630 | 0.143886  | H                                      | 4.347321  | -2.064089 | -4.111635 |
| H                            | -1.270815 | 1.325643  | 2.258736  | H                                      | 2.978966  | -0.874180 | -5.786717 |
| H                            | -1.211304 | 2.498779  | 0.956959  | H                                      | 0.742204  | 0.081119  | -5.168593 |
| H                            | -3.554803 | 2.090093  | 1.964564  | N                                      | -0.248948 | -0.600824 | -1.140434 |
| H                            | -3.449345 | 1.977957  | 0.204016  | O                                      | -1.266814 | 0.439846  | -2.945026 |
| H                            | -3.353814 | -0.417796 | 2.114464  | O                                      | 1.266012  | -1.761672 | 0.167796  |
| H                            | -4.773411 | 0.068925  | 1.181123  | <b>TS3</b>                             |           |           |           |
| <b>III</b>                   |           |           |           | <b>1 imaginary frequency, -1681.5i</b> |           |           |           |
| <b>0 imaginary frequency</b> |           |           |           | C                                      | 0.943577  | 0.456184  | 0.436072  |
| C                            | -2.553504 | -1.166701 | -0.415693 | C                                      | 0.444911  | 0.589640  | -1.004799 |
| C                            | -1.262743 | -0.389803 | -0.118611 | C                                      | 0.088728  | 2.013903  | -1.366663 |
| C                            | -1.519147 | 1.061147  | 0.132367  | C                                      | 1.155309  | 3.021869  | -1.035551 |
|                              |           |           |           | C                                      | 1.663484  | 2.878148  | 0.397118  |



|   |           |           |           |                              |           |           |           |
|---|-----------|-----------|-----------|------------------------------|-----------|-----------|-----------|
| C | 2.077730  | 1.442139  | 0.701262  | H                            | -4.081177 | 8.604293  | -3.346154 |
| H | -0.368282 | 2.117950  | -2.362642 | H                            | -4.280280 | 6.111350  | -3.537362 |
| H | 1.284627  | 0.320189  | -1.676665 | N                            | -2.123568 | 4.099453  | -0.556877 |
| H | 0.106974  | 0.645509  | 1.125829  | O                            | -1.897291 | 2.904687  | -0.053804 |
| H | 1.277967  | -0.579304 | 0.605442  | H                            | -0.992820 | 2.414103  | -0.623983 |
| H | 1.994807  | 2.866558  | -1.744469 | O                            | -3.452242 | 3.443084  | -2.336177 |
| H | 0.794823  | 4.044256  | -1.231356 | O                            | -0.939689 | 5.349271  | 0.997300  |
| H | 2.507878  | 3.565184  | 0.563273  |                              |           |           |           |
| H | 0.862430  | 3.191274  | 1.087923  | <b>3a</b>                    |           |           |           |
| H | 2.950366  | 1.172628  | 0.079334  | <b>0 imaginary frequency</b> |           |           |           |
| H | 2.404884  | 1.353192  | 1.749113  | C                            | -2.282282 | -1.337174 | -0.222167 |
| C | -1.698763 | -2.029660 | -2.512851 | C                            | -1.193555 | -0.300770 | -0.506303 |
| C | -2.490327 | -1.667362 | -1.424984 | C                            | -1.765141 | 1.116468  | -0.575829 |
| C | -3.714215 | -2.272227 | -1.184490 | C                            | -2.529884 | 1.454289  | 0.700858  |
| C | -4.126650 | -3.264531 | -2.081638 | C                            | -3.618274 | 0.425839  | 0.993244  |
| C | -3.331748 | -3.628037 | -3.174079 | C                            | -3.043280 | -0.986151 | 1.053021  |
| C | -2.096769 | -3.011726 | -3.407047 | H                            | -0.945806 | 1.834669  | -0.740645 |
| C | -0.465609 | -1.200273 | -2.476756 | H                            | -0.459640 | -0.336980 | 0.316052  |
| C | -1.781402 | -0.597089 | -0.668597 | H                            | -2.977969 | -1.366512 | -1.076845 |
| H | -4.329740 | -1.984285 | -0.329716 | H                            | -1.824773 | -2.336311 | -0.140482 |
| H | -5.085353 | -3.765113 | -1.927892 | H                            | -1.823709 | 1.487238  | 1.550299  |
| H | -3.682740 | -4.406322 | -3.855501 | H                            | -2.963228 | 2.463971  | 0.619244  |
| H | -1.471219 | -3.291257 | -4.257298 | H                            | -4.131148 | 0.670115  | 1.937563  |
| N | -0.586863 | -0.370269 | -1.356839 | H                            | -4.385636 | 0.472624  | 0.199432  |
| O | 0.475975  | -1.207453 | -3.233113 | H                            | -2.359979 | -1.063959 | 1.918122  |
| O | -2.138312 | -0.030921 | 0.336019  | H                            | -3.844123 | -1.723324 | 1.223690  |
| C | -3.015124 | 5.792185  | -1.812593 | C                            | 0.261160  | -1.091776 | -3.846479 |
| C | -2.249379 | 6.371066  | -0.795449 | C                            | 1.380715  | -1.208052 | -3.025585 |
| C | -2.126984 | 7.746364  | -0.675702 | C                            | 2.624939  | -1.543830 | -3.536586 |
| C | -2.801508 | 8.538122  | -1.613099 | C                            | 2.713696  | -1.762973 | -4.916497 |
| C | -3.566830 | 7.959465  | -2.630094 | C                            | 1.589422  | -1.646420 | -5.740872 |
| C | -3.684229 | 6.568922  | -2.745140 | C                            | 0.337698  | -1.306544 | -5.213756 |
| C | -2.949245 | 4.313973  | -1.674806 | C                            | -0.902722 | -0.722471 | -2.991621 |
| C | -1.658518 | 5.287738  | 0.033359  | C                            | 0.955457  | -0.915844 | -1.629528 |
| H | -1.527260 | 8.192317  | 0.120348  | H                            | 3.498710  | -1.633176 | -2.887707 |
| H | -2.729386 | 9.626198  | -1.550091 | H                            | 3.676186  | -2.029557 | -5.359108 |

---

|   |           |           |           |   |           |           |           |
|---|-----------|-----------|-----------|---|-----------|-----------|-----------|
| H | 1.692220  | -1.824021 | -6.813840 | O | -2.047141 | -0.530867 | -3.332227 |
| H | -0.543771 | -1.213858 | -5.851714 | O | 1.623844  | -0.910762 | -0.623104 |
| N | -0.412272 | -0.636312 | -1.689321 | H | -2.439054 | 1.186428  | -1.445448 |

---

## 6. References

- (1) S. Coseri, G. Biliuta and B. C. Simionescu, Selective oxidation of cellulose, mediated by N-hydroxyphthalimide, under a metal-free environment, *Polym. Chem.*, 2018, **9**, 961–967.
- (2) S.-L. Liu, Q.-Y. Deng, W.-W. Fang, J.-F. Gong, M.-P. Song, M.-Z. Xu and T. Tu, Efficient and scalable Pd-catalyzed double aminocarbonylations under atmospheric pressure at low catalyst loadings, *Org. Chem. Front.*, 2014, **1**, 1261–1265.
- (3) S. W. Lardy and V. A. Schmidt, Intermolecular Radical Mediated Anti-Markovnikov Alkene Hydroamination Using *N*-Hydroxyphthalimide, *J. Am. Chem. Soc.* 2018, **140**, 12318–12322.
- (4) S. N. Rao, D. C. Mohan and S. Adimurthy, L-Proline: An Efficient Catalyst for Transamidation of Carboxamides with Amines, *Org. Lett.* 2013, **15**, 1496–1499.
- (5) B. Martin, H. Sekljic and C. Chassaing, Microwave-Assisted Solid-Phase Synthesis of Phthalimides, *Org. Lett.* 2003, **5**, 1851–1853.
- (6) D. Padula, G. Mazzeo, E. Santoro, P. Scafato, S. Belviso and S. Superchi, Amplification of the chiroptical response of UVtransparent amines and alcohols by *N*-phthalimide derivatization enabling absolute configuration determination through ECD computational analysis, *Org. Biomol. Chem.*, 2020, **18**, 2094–2102.
- (7) Gaussian 16 Rev. A.03, M. J. Frisch, G. W. Trucks, H. B. Schlegel, G. E. Scuseria, M. A. Robb, J. R. Cheeseman, G. Scalmani, V. Barone, G. A. Petersson, H. Nakatsuji, X. Li, M. Caricato, A. V. Marenich, J. Bloino, B. G. Janesko, R. Gomperts, B. Mennucci, H. P. Hratchian, J. V. Ortiz, A. F. Izmaylov, J. L. Sonnenberg, Williams, F. Ding, F. Lipparini, F. Egidi, J. Goings, B. Peng, A. Petrone, T. Henderson, D. Ranasinghe, V. G. Zakrzewski, J. Gao, N. Rega, G. Zheng, W. Liang, M. Hada, M. Ehara, K. Toyota, R. Fukuda, J. Hasegawa, M. Ishida, T. Nakajima, Y. Honda, O. Kitao, H. Nakai, T. Vreven, K. Throssell, J. A. Montgomery Jr, J. E. Peralta, F. Ogliaro, M. J. Bearpark, J. J. Heyd, E. N. Brothers, K. N. Kudin, V. N. Staroverov, T. A. Keith, R. Kobayashi, J. Normand, K. Raghavachari, A. P. Rendell, J. C. Burant, S. S. Iyengar, J. Tomasi, M. Cossi, J. M. Millam, M. Klene, C. Adamo, R. Cammi, J. W. Ochterski, R. L. Martin, K. Morokuma, O. Farkas, J. B. Foresman, D. J. Fox, Gaussian Inc. Wallingford CT, 2016.
- (8) M. Ernzerhof, G. E. Scuseria, Assessment of the Perdew–Burke–Ernzerhof exchange–correlation functional, *J. Chem. Phys.*, 1999, **110**, 5029–5036.

- 
- (9)F. Weigend, R. Ahlrichs, Balanced basis sets of split valence, triple zeta valence and quadruple zeta valence quality for H to Rn: Design and assessment of accuracy,*Phys. Chem. Chem. Phys.*, 2005, **7**, 3297–3305.
- (10)F. Weigend, Accurate Coulomb-fitting basis sets for H to Rn,*Phys. Chem. Chem. Phys.*, 2006, **8**, 1057–1065.
- (11)Y. Zhao, D. G. Truhlar, The M06 suite of density functionals for main group thermochemistry, thermochemical kinetics, noncovalent interactions, excited states, and transition elements: two new functionals and systematic testing of four M06-class functionals and 12 other functionals, *Theor. Chem. Acc.*, 2008, **120**, 215–241.
- (12)A. V. Marenich, C. J. Cramer, D. G. Truhlar, Universal Solvation Model Based on Solute Electron Density and on a Continuum Model of the Solvent Defined by the Bulk Dielectric Constant and Atomic Surface Tensions, *J. Phys. Chem. B*, 2009, **113**, 6378–6396.
- (13)CYLview, 1.0b, C. Y. Legault, Université de Sherbrooke, 2009.
- (14)S. Ladouceur, D. Fortin, E. Zysman-Colman, Enhanced Luminescent Iridium(III) Complexes Bearing Aryltriazole Cyclometallated Ligands,*Inorg. Chem.*, 2011, **50**, 11514–11526.
- (15) W.-G. Xu, H.-M. Jiang, J. Leng, H.-W. Ong and J. Wu, Visible - Light - Induced Selective Defluoroborylation of Polyfluoroarenes, gem-Difluoroalkenes, and Trifluoromethylalkenes,*Angew.Chem. Int.Ed.*, 2020, **59**, 4009–4016.
- (16) G. Pandey, D. Pooranchand, U. T. Bhalerao, Photoinduced single electron transfer activation of organophosphines: Nucleophilic trapping of phosphine radical cation, *Tetrahedron*, 1991, **47**, 1745–1752.

## 7. Copies of NMR Spectra

Product 3a:  $^1\text{H}$  NMR.

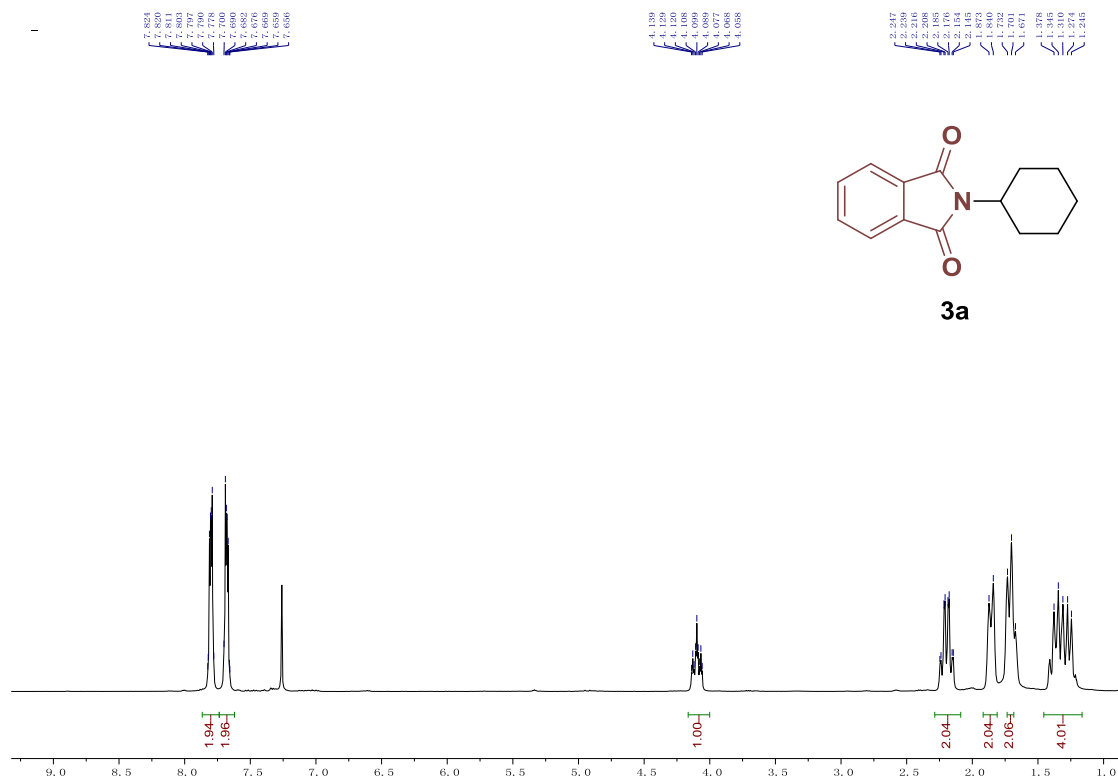

Product 3b:  $^1\text{H}$  NMR.

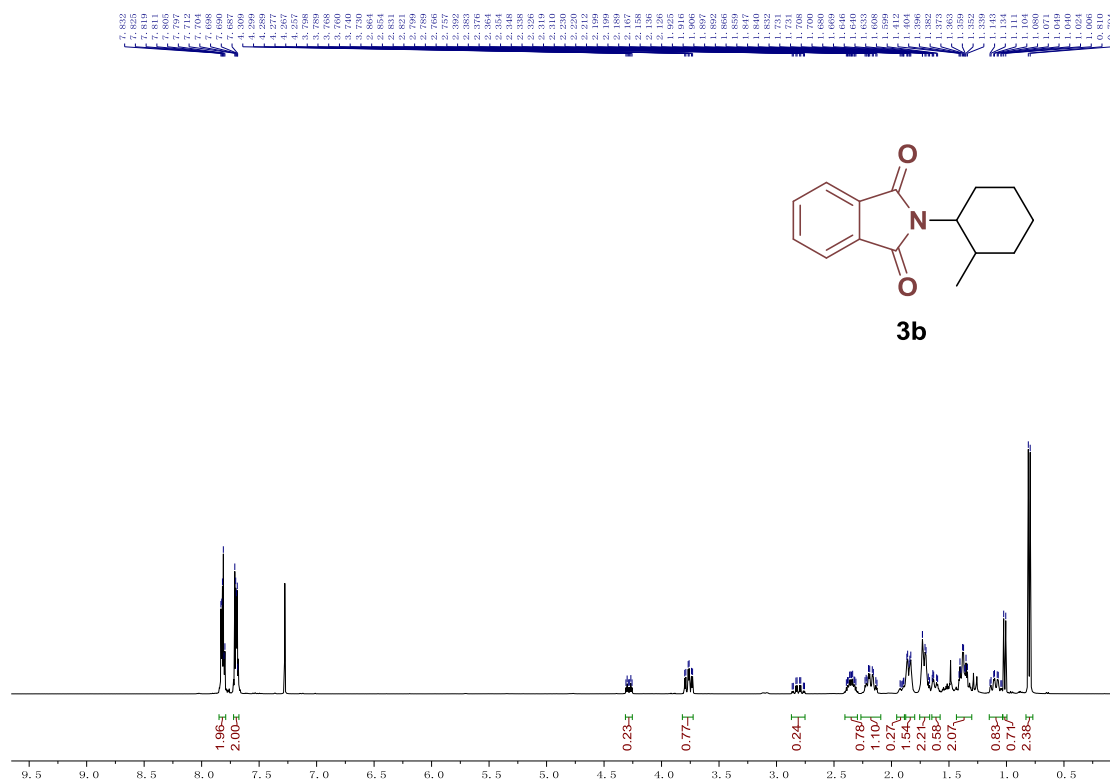

Product 3c:  $^1\text{H}$  NMR.

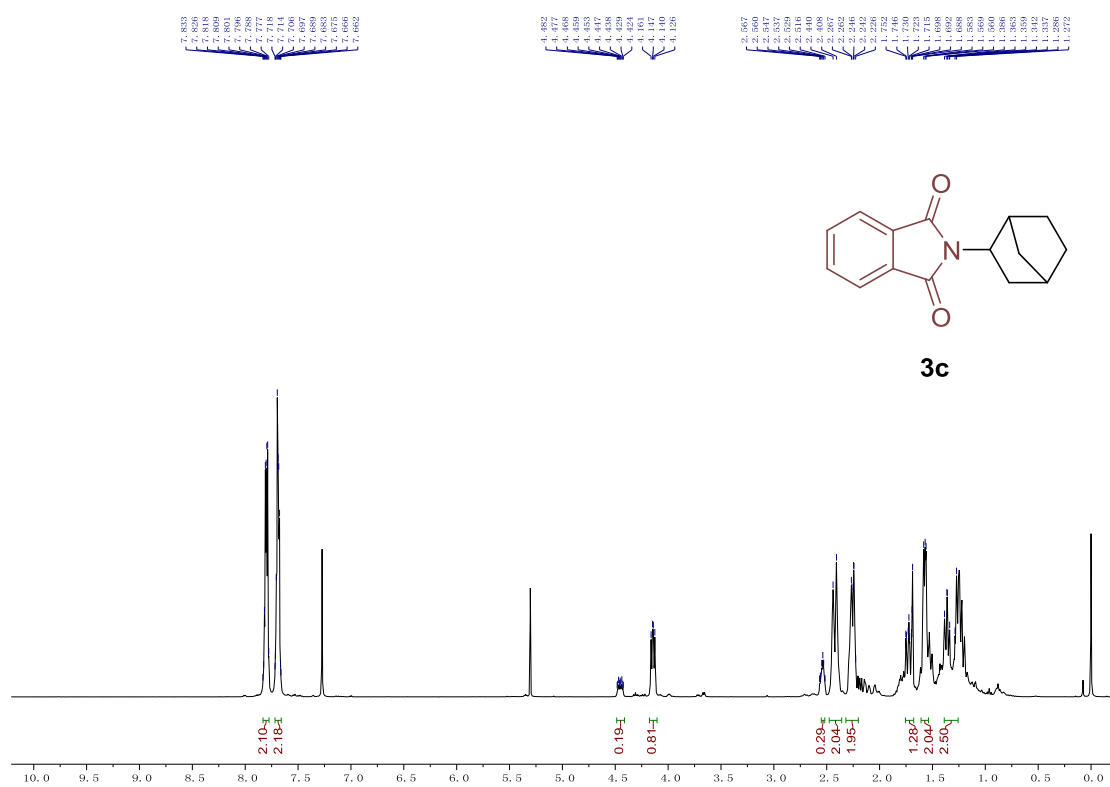

**Product 3d:**  $^1\text{H}$  NMR.

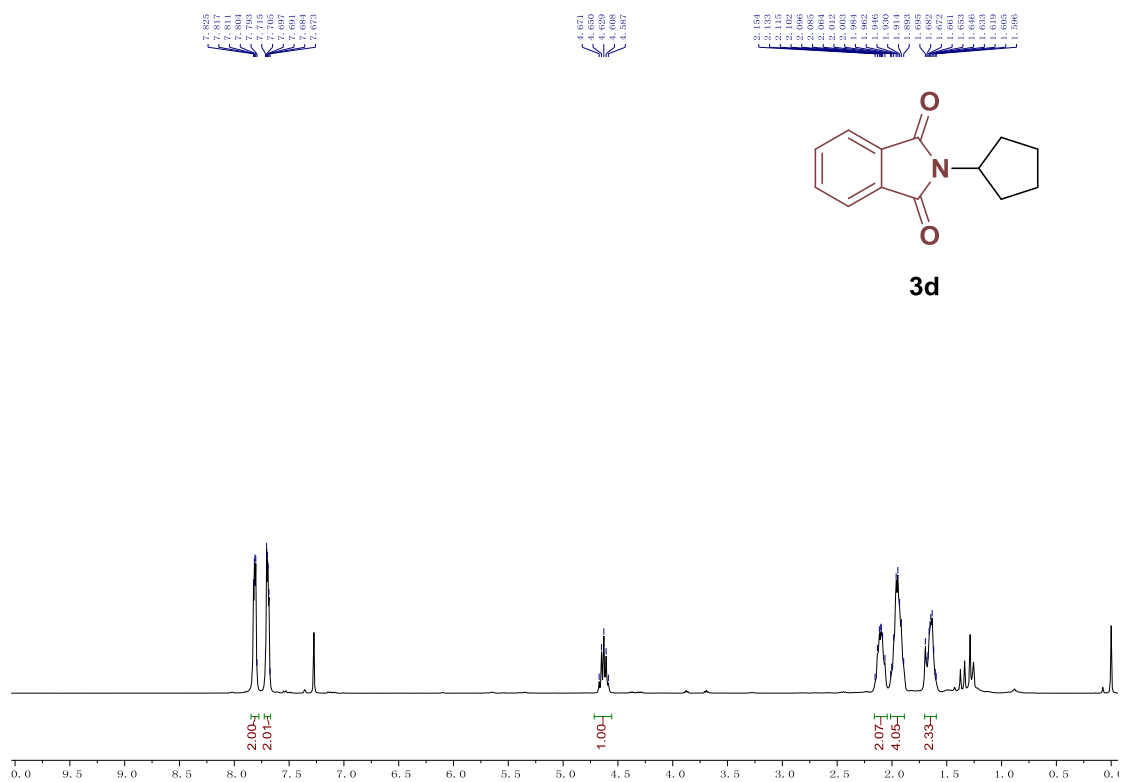



Product 3e:  $^1\text{H}$  NMR.

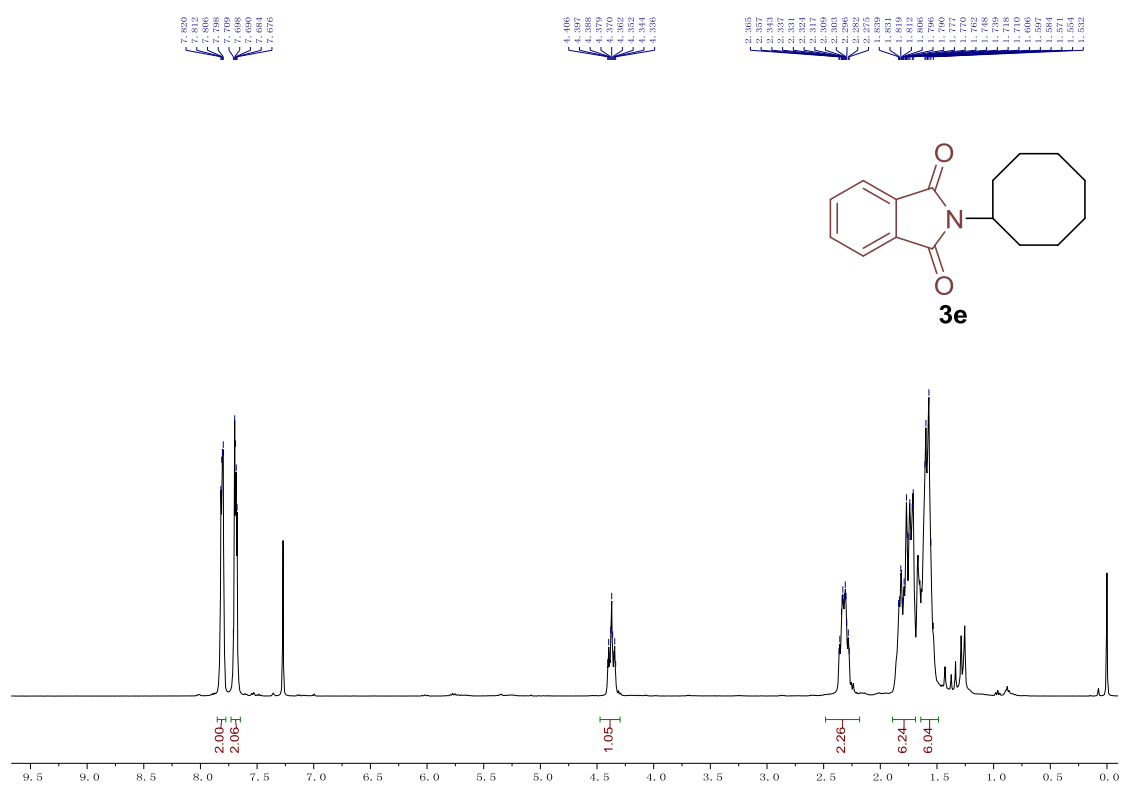

Product 3f:  $^1\text{H}$  NMR.

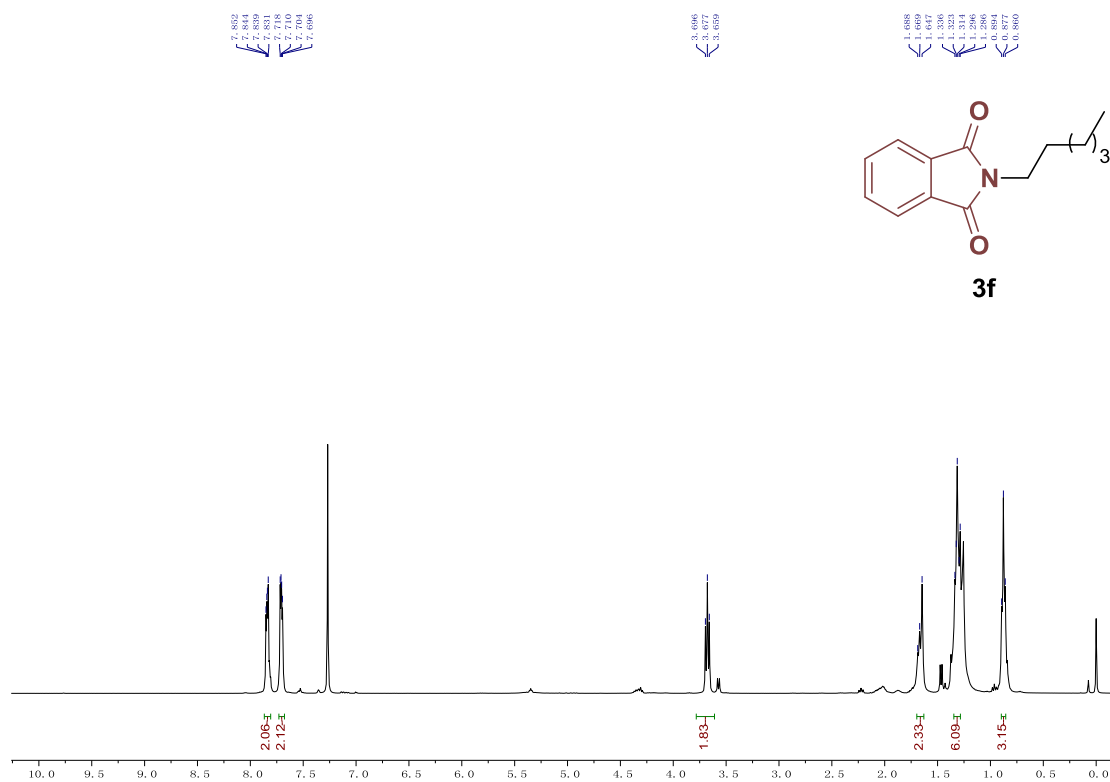

Product 3g:  $^1\text{H}$  NMR.

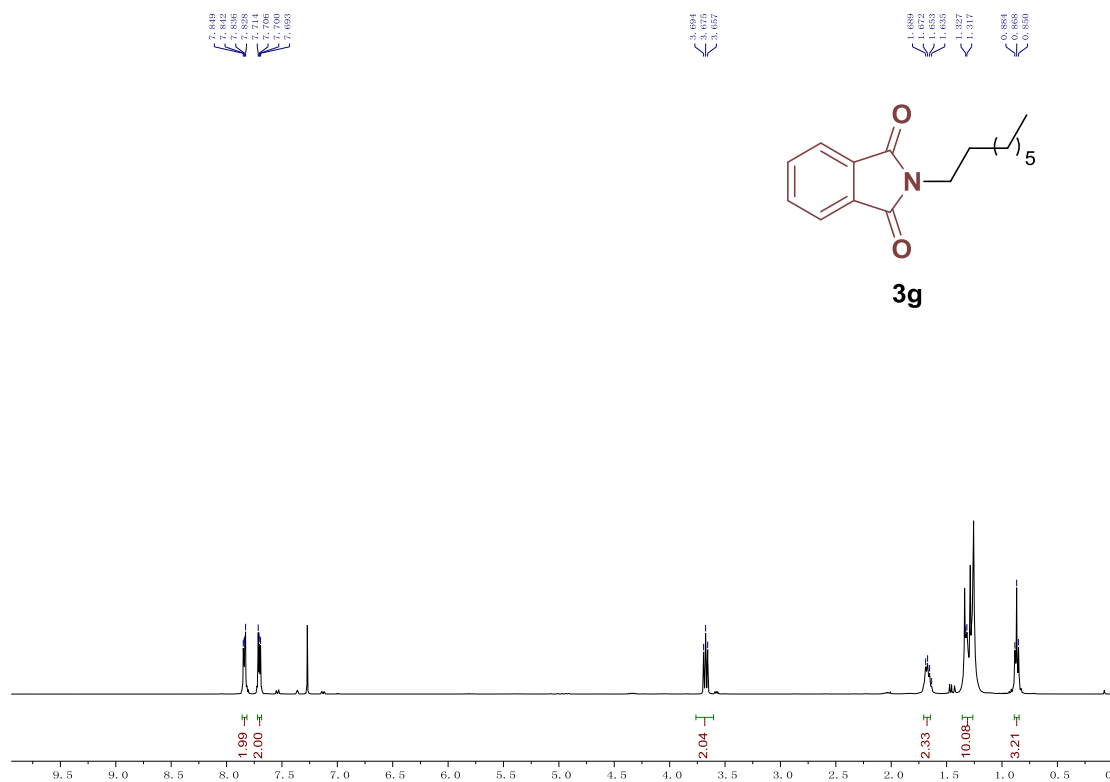

Product 3h:  $^1\text{H}$  NMR and  $^{13}\text{C}$  NMR.

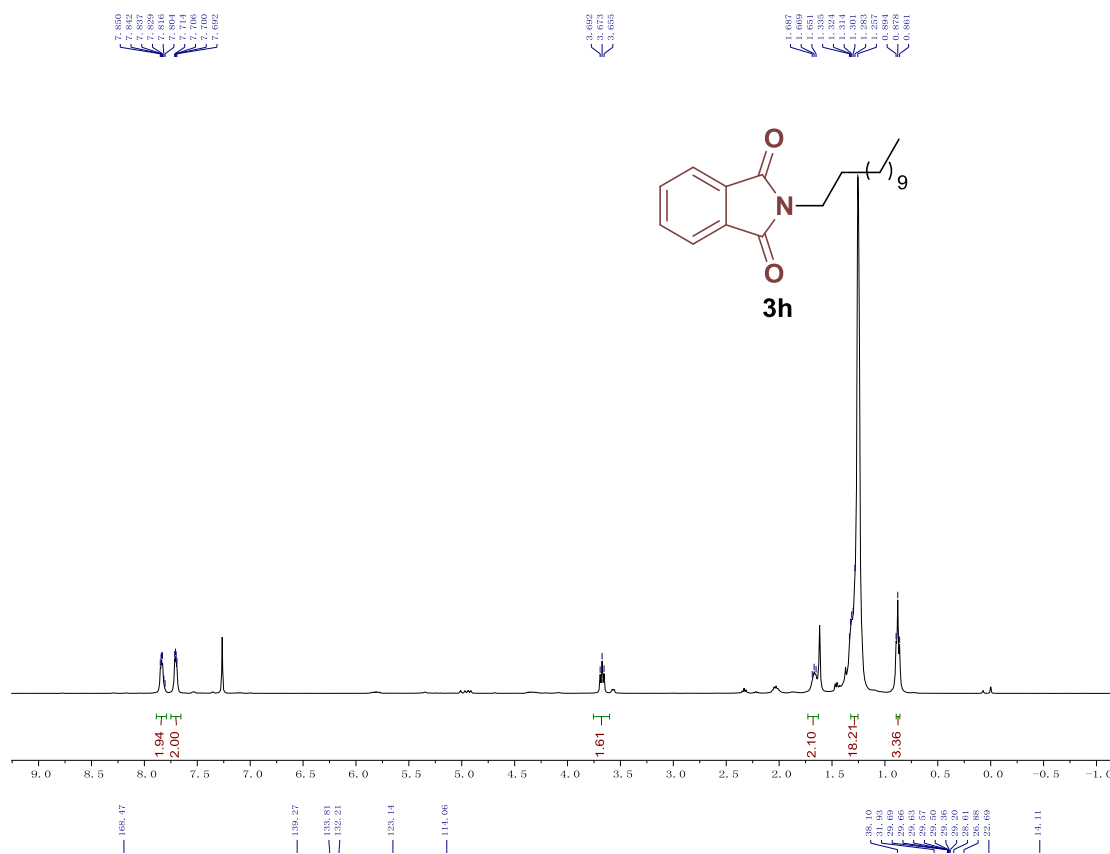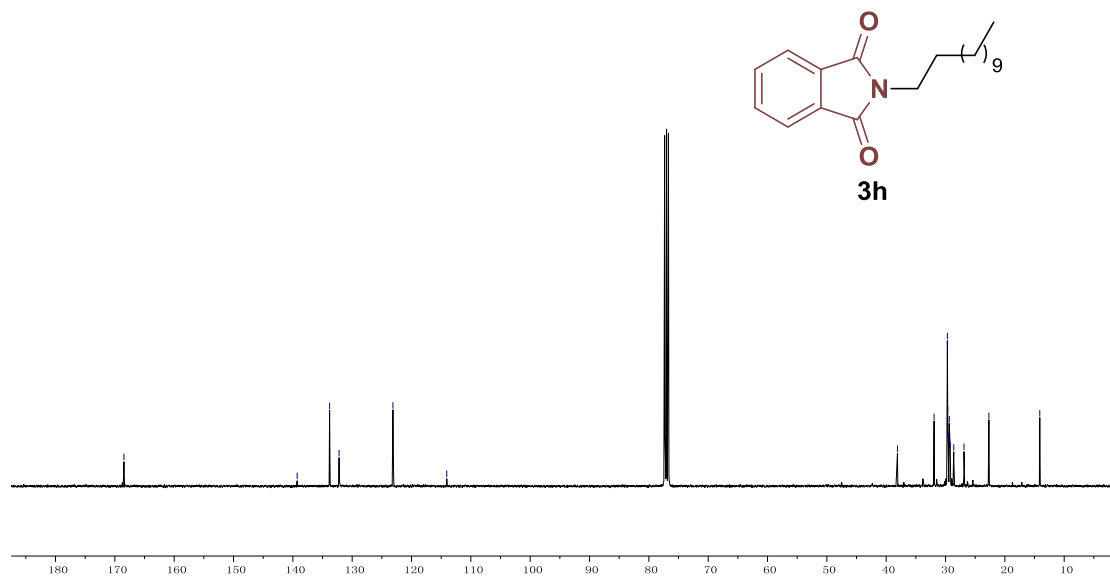

Product **3i**:  $^1\text{H}$  NMR and  $^{13}\text{C}$  NMR.

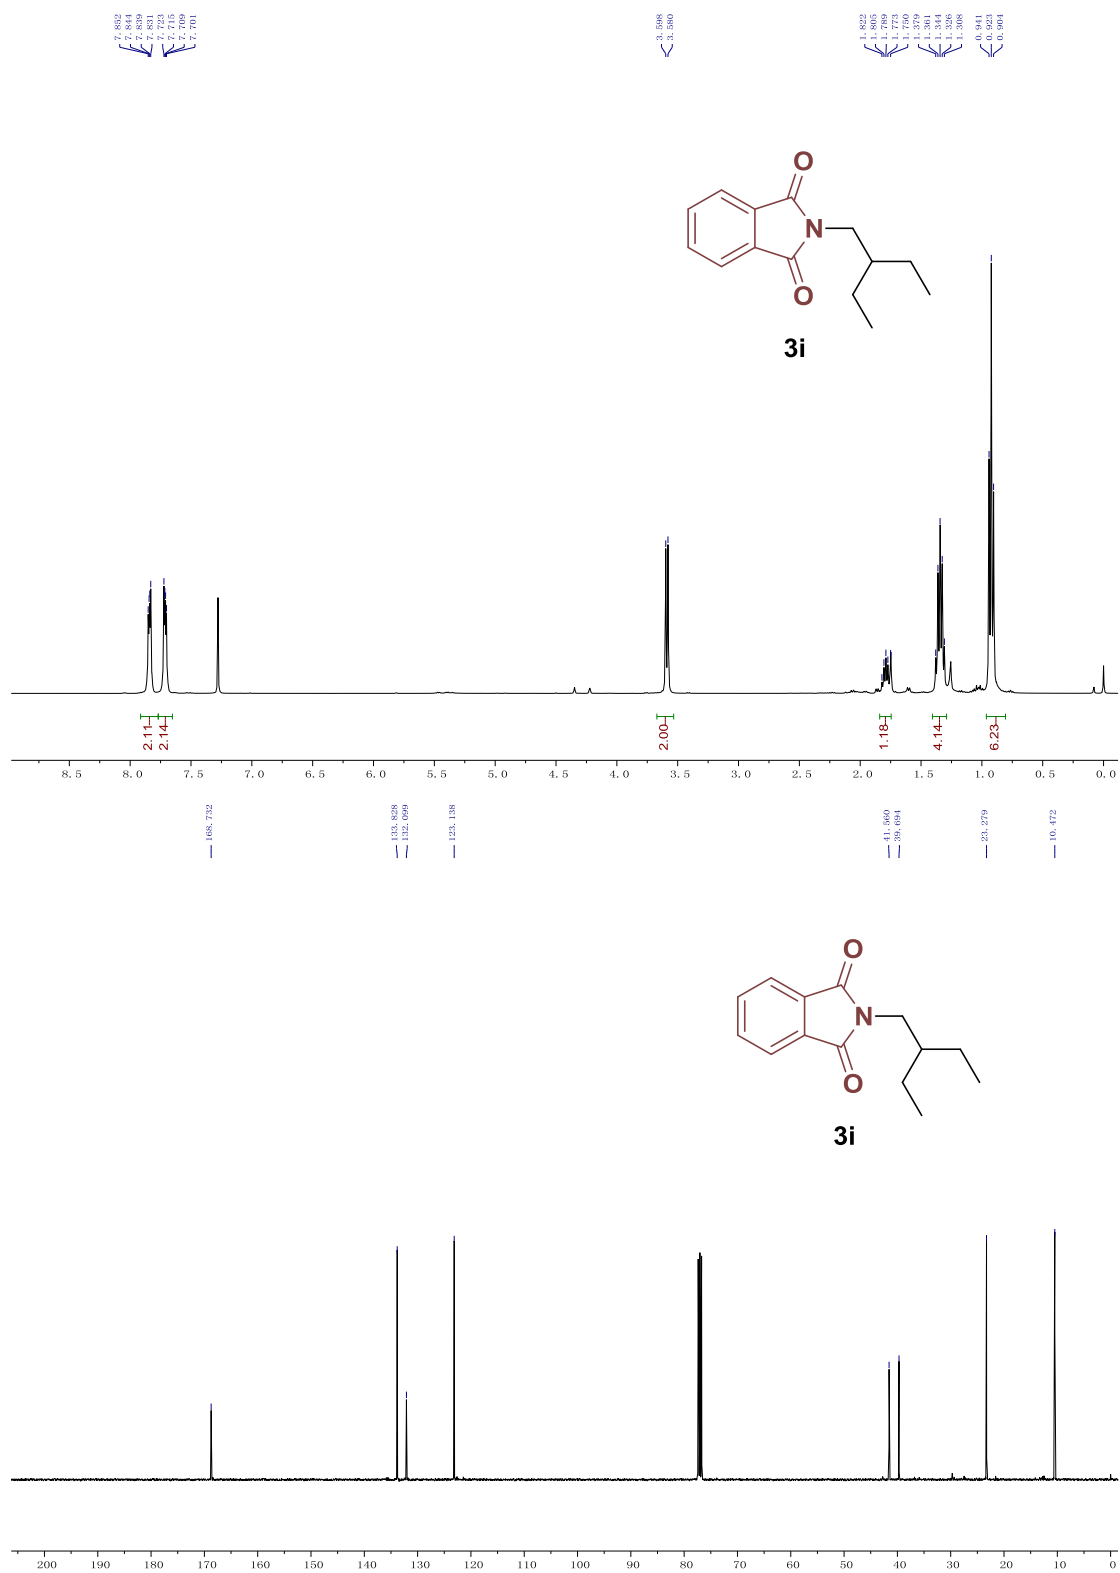

Product 3j:  $^1\text{H}$  NMR.

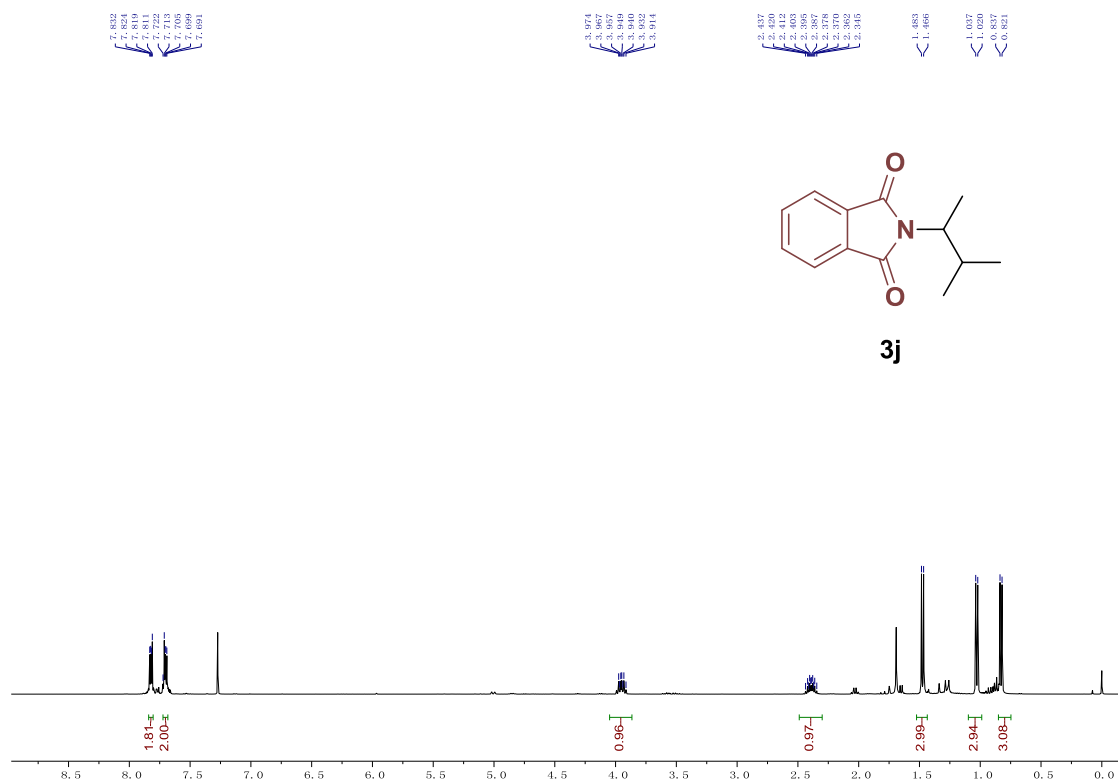

Product 3k:  $^1\text{H}$  NMR and  $^{13}\text{C}$  NMR.

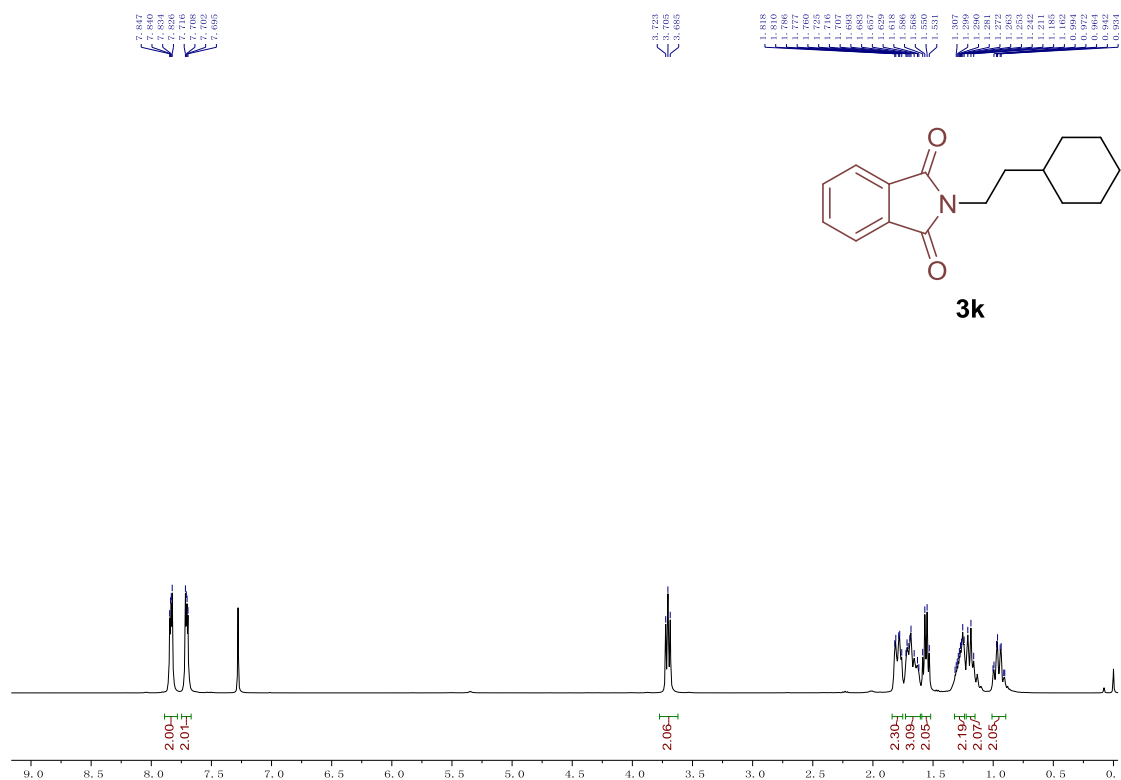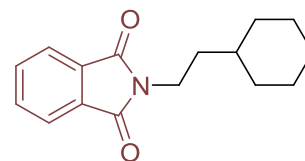

3k

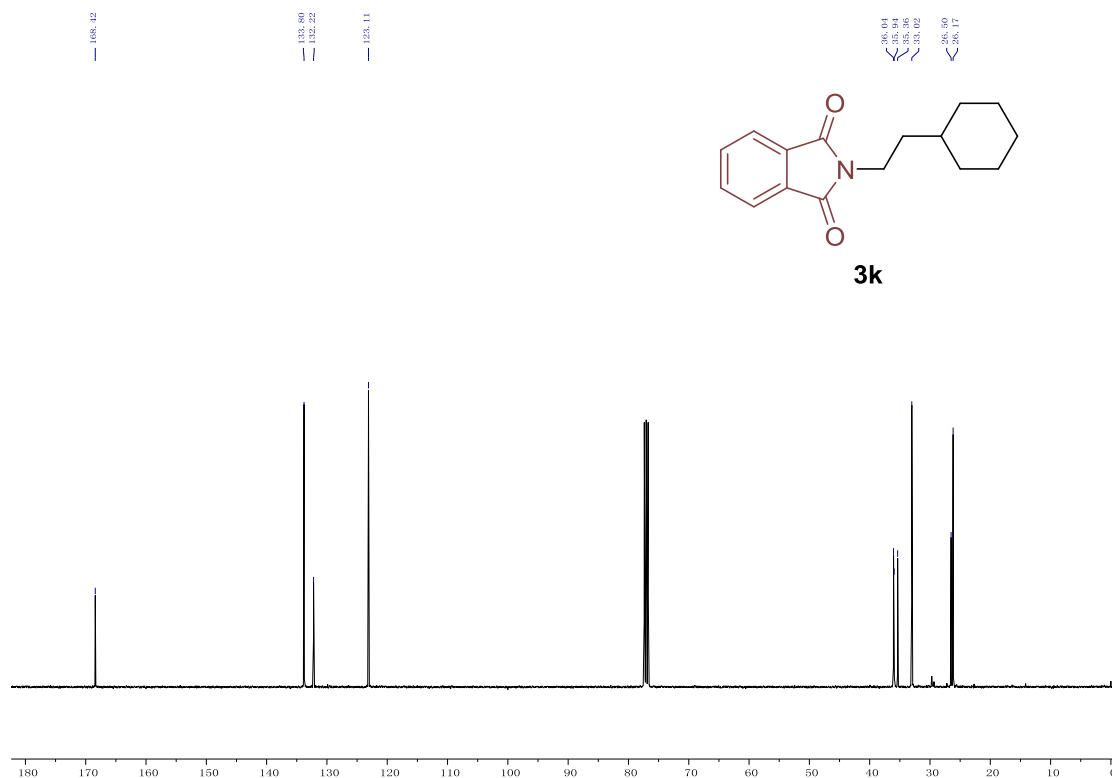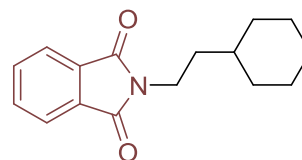

3k

Product 31:  $^1\text{H}$  NMR.

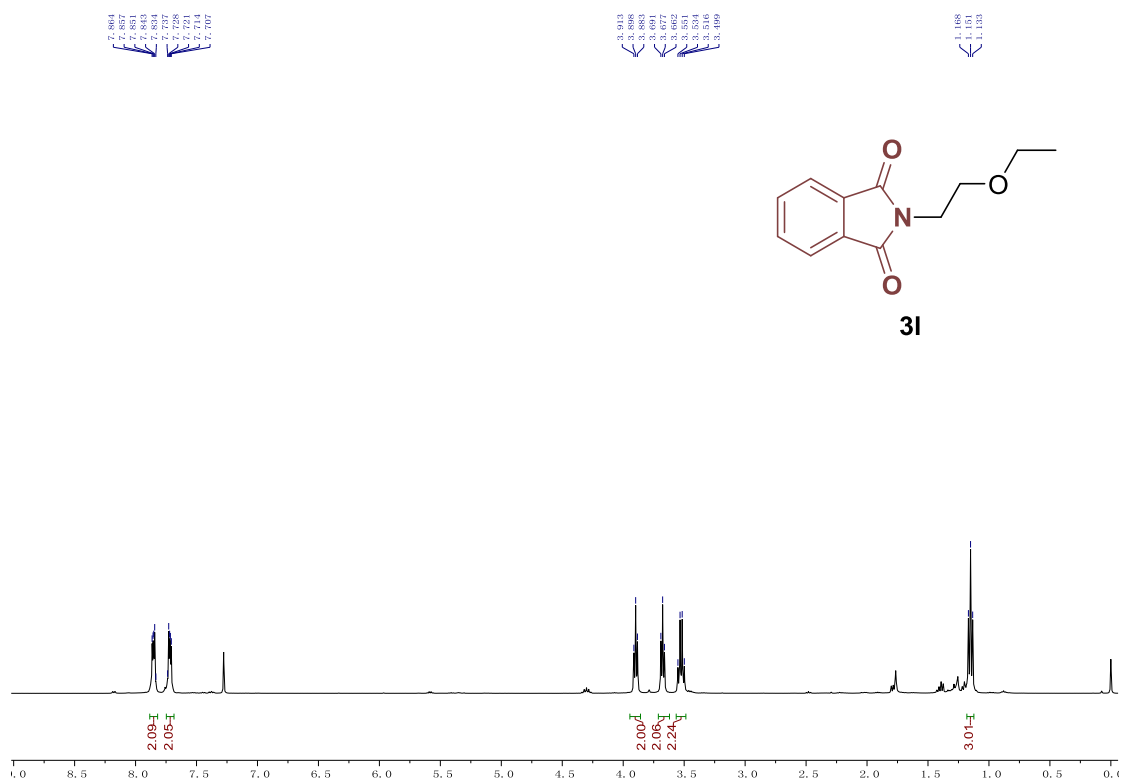



Product 3m:  $^1\text{H}$  NMR.

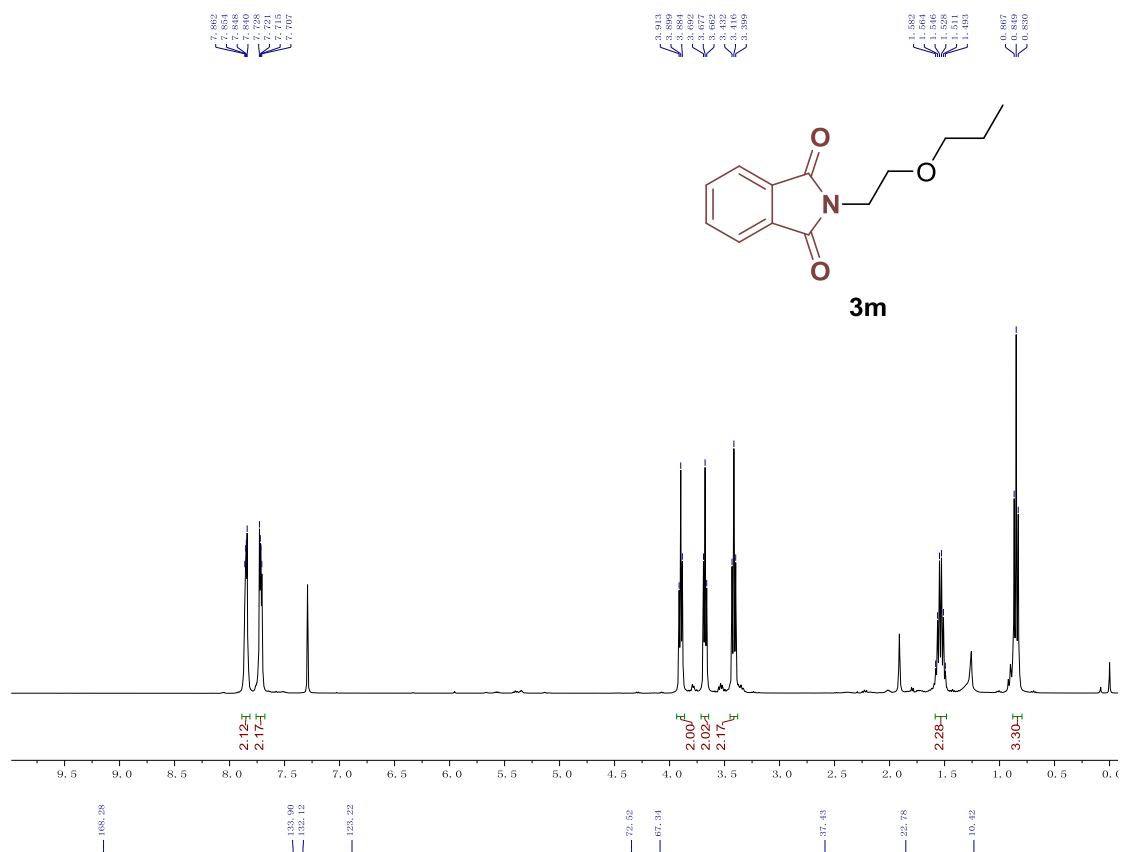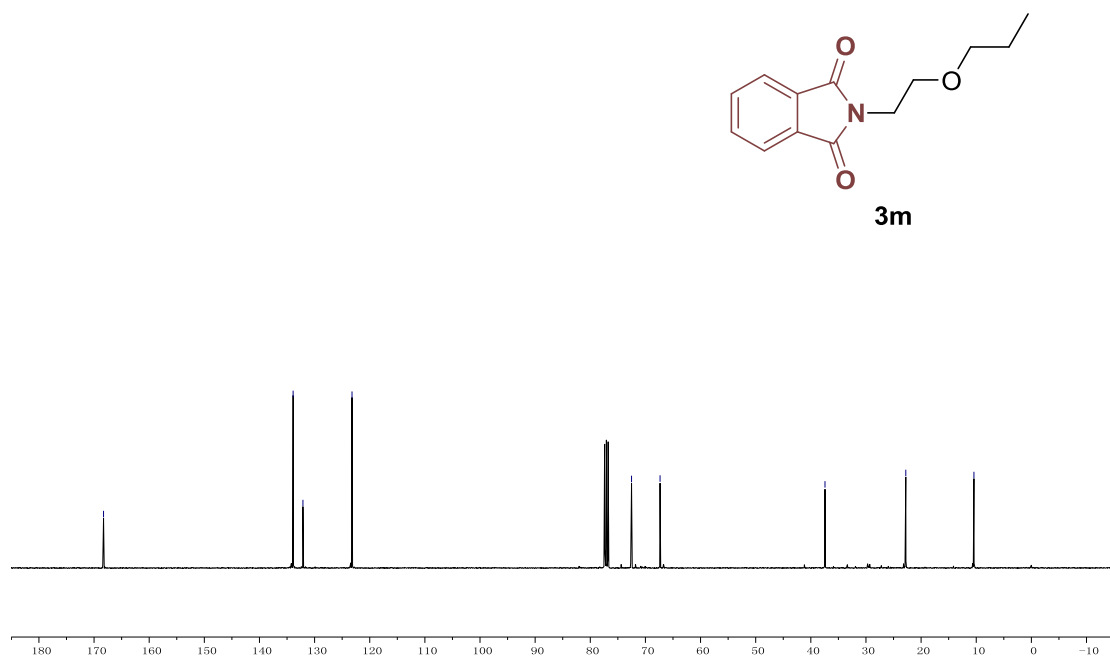

**Product 3n:  $^1\text{H}$  NMR.**

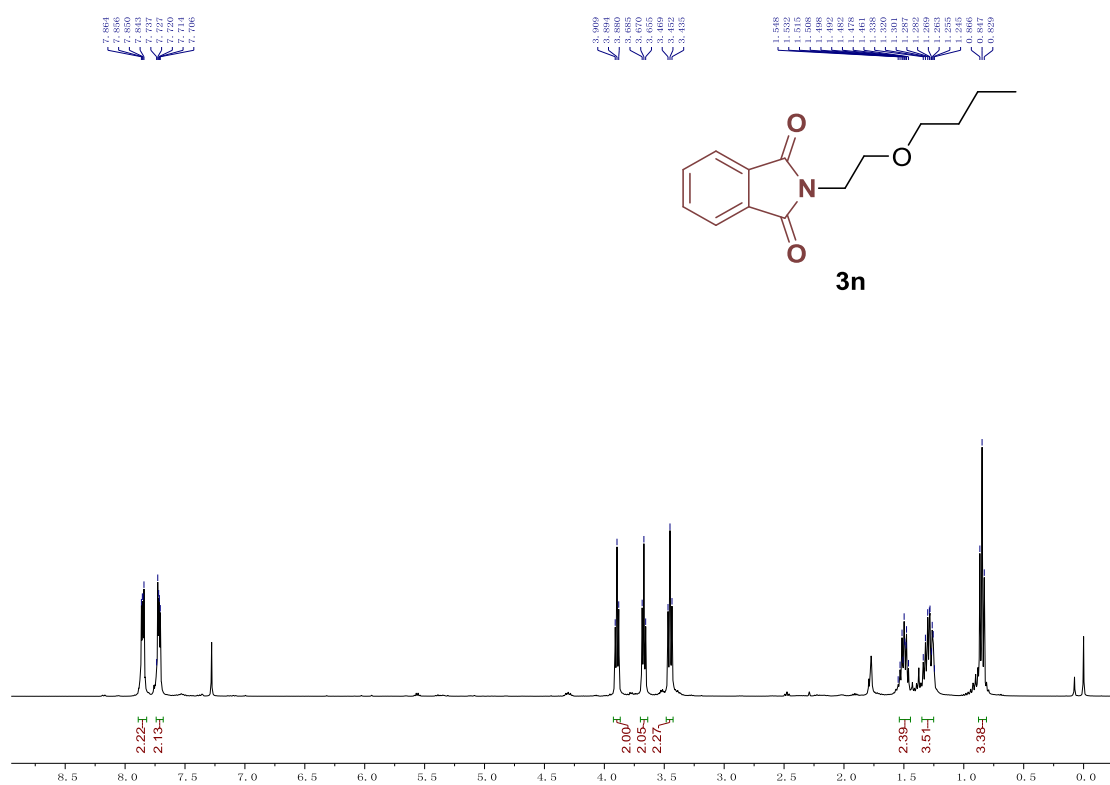

Product 3o: <sup>1</sup>H NMR.

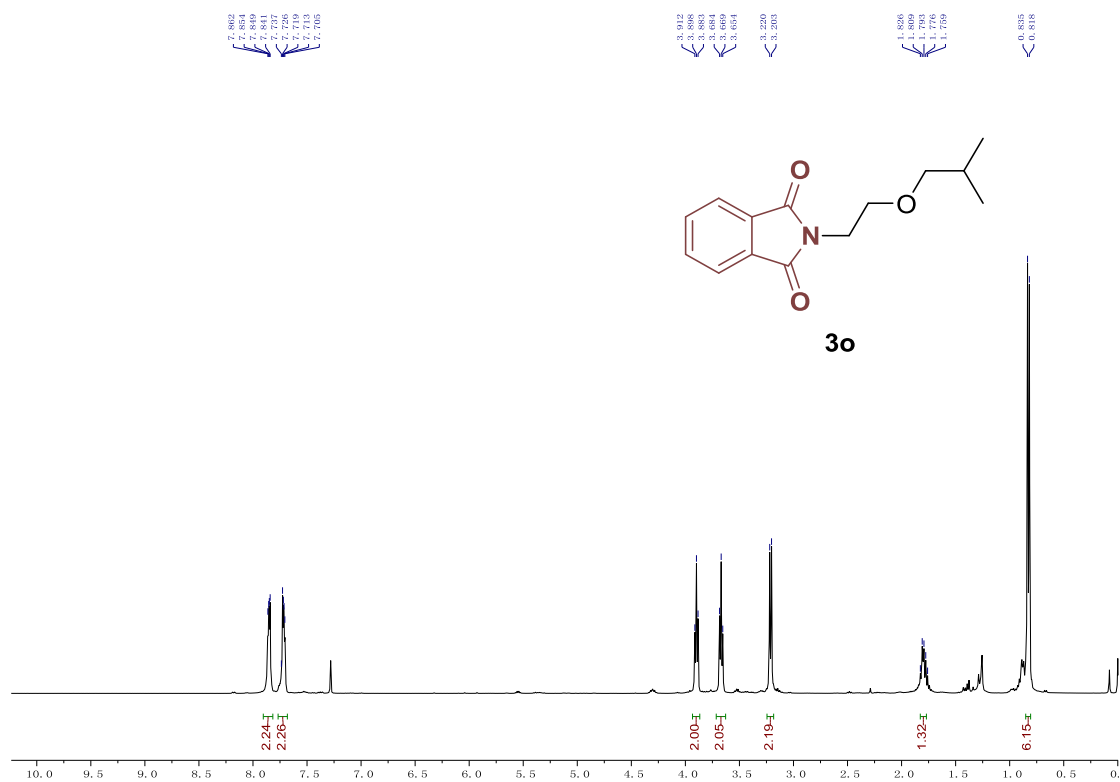

**Product 3p:**  $^1\text{H}$  NMR.

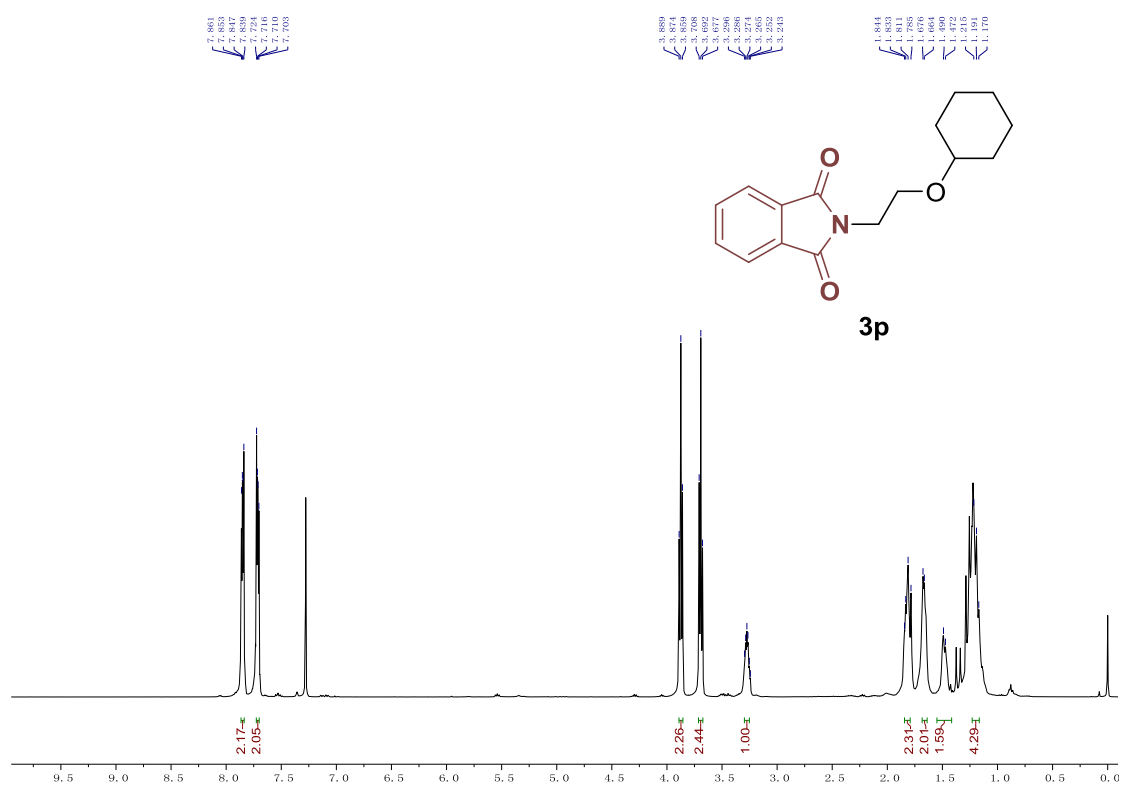

**Product 3q:**  $^1\text{H}$  NMR.

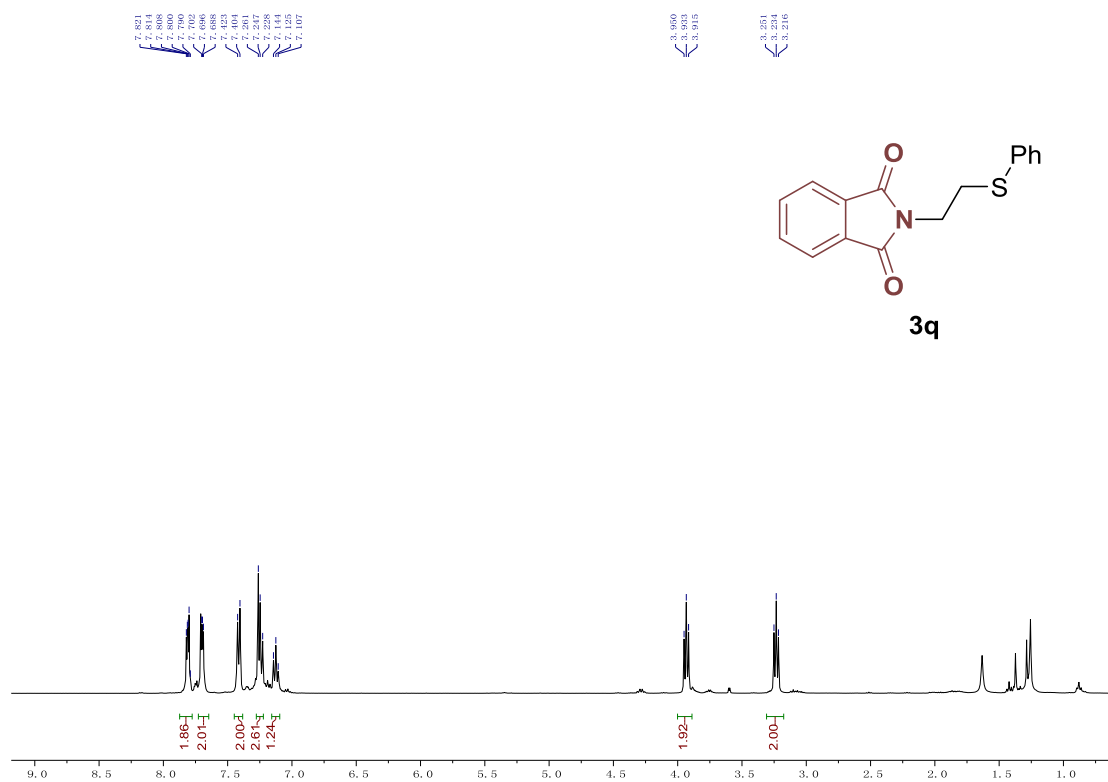

Product 3r:  $^1\text{H}$  NMR.

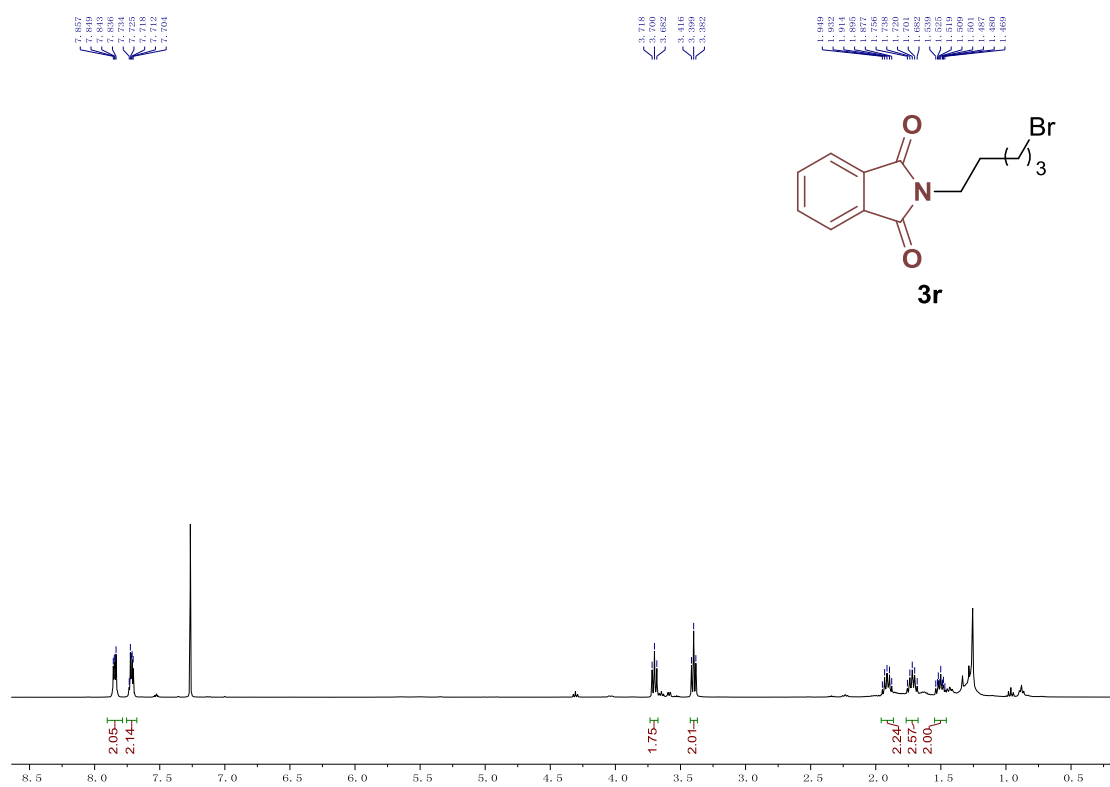

Product 3s:  $^1\text{H}$  NMR.

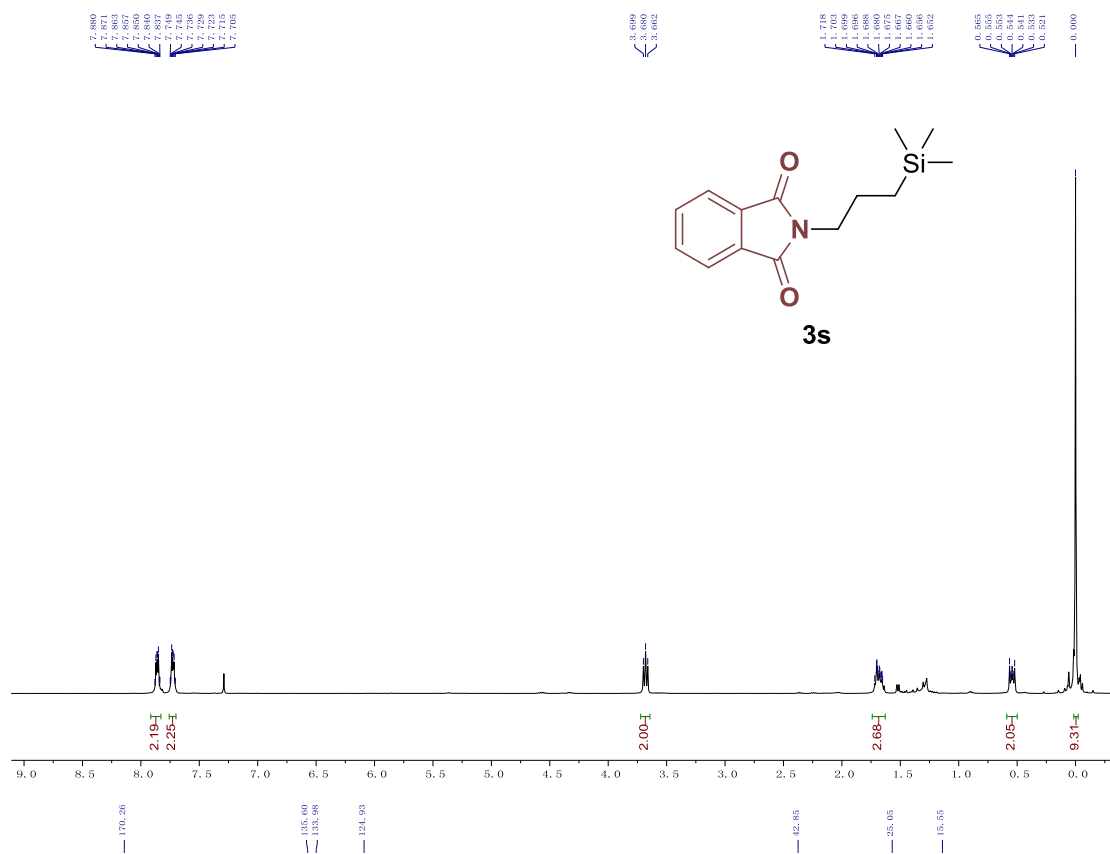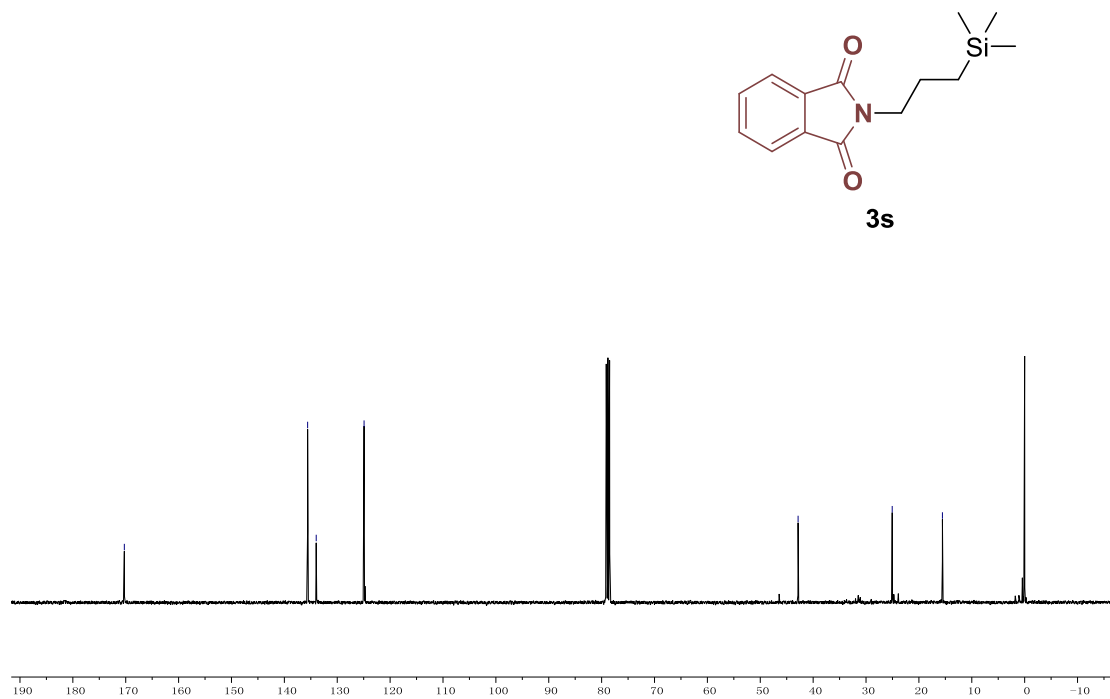

Supplement: d0qo01321h1.pdf [file d0qo01321h1.pdf]
